# Supplementary material
Source: publisher figshare collection journal article supplement (https://tandf.figshare.com/articles/dataset/_/18393669)
Supplement: Supplementary file 1 [file 2]

**Supplementary Table 2.**  
**Variants and ethnicity of the patients with *NMNAT1*-associated retinopathy**

| Reference # | Published year, Authors     | Patient #          | Status | Genomic Variant       | Protein Variant | Ethnicity              |
|-------------|-----------------------------|--------------------|--------|-----------------------|-----------------|------------------------|
| 19          | 2020, Surl et al.           | 30                 | HTZ    | exon 2 deletion       |                 | Korean                 |
| 43          | 2020, Sallum, et al.        | 62.1               | HTZ    | exon 2-4 duplication  |                 | Brazilian              |
| 19          | 2020, Surl et al.           | 29                 | HTZ    | exon 4-5 deletion     |                 | Korean                 |
| 25          | 2015, Coppieters et al.     | F3-II:1            | HTZ    | partial gene deletion |                 | Japanese               |
| 25          | 2015, Coppieters et al.     | F4-II:1            | HTZ    | partial gene deletion |                 | Japanese               |
| 40          | 2020, Bedoni et al.         | Family 1-P1        | HMZ    | 7.1kb duplication     |                 | Italy                  |
| 40          | 2020, Bedoni et al.         | Family 2-P3        | HMZ    | 7.1kb duplication     |                 | Italy                  |
| 25          | 2015, Coppieters et al.     | F1-IV:1            | HMZ    | c.-70A>T              |                 | Niger                  |
| 25          | 2015, Coppieters et al.     | F1-IV:1            | HMZ    | c.-70A>T              |                 | Niger                  |
| 25          | 2015, Coppieters et al.     | F2-IV:2            | HMZ    | c.-70A>T              |                 | Morocco                |
| 25          | 2015, Coppieters et al.     | F2-IV:2            | HMZ    | c.-69C>T              |                 | Morocco                |
| 43          | 2020, Sallum, et al.        | 64.1               | HTZ    | c.-57+21C>T           |                 | Brazilian              |
| 10          | 2012, Perrault et al.       | P1                 | HTZ    | c.1A>G                |                 | Italy                  |
| 18          | 2018, Hosono et al.         | EYE42              | HTZ    | c.1A>G                |                 | Japanese               |
| 37          | 2018, Weisschuh, et al.     | 10                 | HTZ    | c.12dup               | p.Glu5Argfs*4   | German                 |
| 12          | 2012, Falk et al.           | CHOP/MEEI-047-IV-1 | HMZ    | c.25G>A               | p.Val9Met       | Pakistani              |
| 12          | 2012, Falk et al.           | LVPEI-73-II-2      | HMZ    | c.25G>A               | p.Val9Met       | Indian                 |
| 27          | 2015, Hedergott et al.      | II.1               | HMZ    | c.25G>A               | p.Val9Met       | Pakistani              |
| 12          | 2012, Falk et al.           | CHOP/MEEI-047-IV-1 | HMZ    | c.25G>A               | p.Val9Met       | Pakistani              |
| 12          | 2012, Falk et al.           | LVPEI-73-II-2      | HMZ    | c.25G>A               | p.Val9Met       | Indian                 |
| 27          | 2015, Hedergott et al.      | II.1               | HMZ    | c.25G>A               | p.Val9Met       | Pakistani              |
| 10          | 2012, Perrault et al.       | P18                | HTZ    | c.37G>A               | p.Ala13Thr      | France                 |
| 11          | 2012, Koenekoop et al.      | MOGL3698           | HTZ    | c.37G>A               | p.Ala13Thr      | Haitian (African)      |
| 12          | 2012, Falk et al.           | UCL-3-II-1         | HTZ    | c.37G>A               | p.Ala13Thr      | Caribbean              |
| 33          | 2017, Porto et al.          | 20-FBP_57          | HTZ    | c.37G>A               | p.Ala13Thr      | Brazilian              |
| 41          | 2020, Habibi et al.         | F16-V.4            | HMZ    | c.37G>A               | p.Ala13Thr      | Tunisia                |
| 43          | 2020, Sallum, et al.        | 63.1               | HMZ    | c.37G>A               | p.Ala13Thr      | Brazilian              |
| 41          | 2020, Habibi et al.         | F16-V.4            | HMZ    | c.37G>A               | p.Ala13Thr      | Tunisia                |
| 16          | 2016, Wang et al.           | 19                 | HTZ    | c.43G>A               | p.Gly15Ser      | Han Chinese            |
| 23          | 2014, Siemiatkowska et al.  | 1                  | HTZ    | c.53A>G               | p.Asn18Ser      | German/French          |
| 25          | 2015, Coppieters et al.     | F9                 | HTZ    | c.53A>G               | p.Asn18Ser      | NA                     |
| 32          | 2017, Di Iorio et al.       | 27                 | HTZ    | c.53A>G               | p.Asn18Ser      | Italy                  |
| 35          | 2018, Nash et al.           | Case 2             | HTZ    | c.53A>G               | p.Asn18Ser      | Caucasian              |
| 12          | 2012, Falk et al.           | UCL-5-II-2         | HTZ    | c.59T>A               | p.Ile20Asn      | Polish                 |
| 44          | 2020, Skorzyl-Werner et al. | 9-29               | HTZ    | c.59T>A               | p.Ile20Asn      | Polish                 |
| 44          | 2020, Skorzyl-Werner et al. | 19-47              | HTZ    | c.65A>G               | p.Asn22Ser      | Polish                 |
| 12          | 2012, Falk et al.           | LVPEI-79-IV-1      | HMZ    | c.98A>G               | p.Asp33Gly      | Indian                 |
| 12          | 2012, Falk et al.           | LVPEI-79-IV-1      | HMZ    | c.98A>G               | p.Asp33Gly      | Indian                 |
| 9           | 2012, Chiang et al.         | 7                  | HTZ    | c.104T>C              | p.Met35Thr      | USA                    |
| 24          | 2015, Wang et al.           | 94                 | HTZ    | c.116-2A>G            |                 | Chinese                |
| 12          | 2012, Falk et al.           | UCL-2-II-2         | HTZ    | c.161C>T              | p.Ala54Val      | Caribbean & Sri Lankan |
| 12          | 2012, Falk et al.           | CHOP/MEEI-007-II-2 | HTZ    | c.196C>T              | p.Arg66Trp      | Asian American         |
| 22          | 2014, Jin et al.            | Family035-II-2     | HTZ    | c.196C>T              | p.Arg66Trp      | Chinese                |
| 29          | 2016, Xu et al.             | LH01-II:1          | HTZ    | c.196C>T              | p.Arg66Trp      | Chinese                |
| 30          | 2017, Jinda et al.          | LCATH3             | HTZ    | c.196C>T              | p.Arg66Trp      | Thai                   |
| 31          | 2017, Han et al.            | P4                 | HTZ    | c.196C>T              | p.Arg66Trp      | Korean                 |
| 31          | 2017, Han et al.            | P5                 | HTZ    | c.196C>T              | p.Arg66Trp      | Korean                 |
| 18          | 2018, Hosono et al.         | EYE159             | HTZ    | c.196C>T              | p.Arg66Trp      | Japanese               |
| 18          | 2018, Hosono et al.         | S132               | HTZ    | c.196C>T              | p.Arg66Trp      | Japanese               |
| 38          | 2020, Xu et al.             | -                  | HTZ    | c.196C>T              | p.Arg66Trp      | Chinese                |
| 19          | 2020, Surl et al.           | 23                 | HTZ    | c.196C>T              | p.Arg66Trp      | Korean                 |
| 19          | 2020, Surl et al.           | 24                 | HTZ    | c.196C>T              | p.Arg66Trp      | Korean                 |
| 19          | 2020, Surl et al.           | 25                 | HTZ    | c.196C>T              | p.Arg66Trp      | Korean                 |
| 19          | 2020, Surl et al.           | 26                 | HTZ    | c.196C>T              | p.Arg66Trp      | Korean                 |
| 19          | 2020, Surl et al.           | 27                 | HTZ    | c.196C>T              | p.Arg66Trp      | Korean                 |
| 19          | 2020, Surl et al.           | 28                 | HTZ    | c.196C>T              | p.Arg66Trp      | Korean                 |
| 45          | 2021, Han et al.            | -                  | HTZ    | c.196C>T              | p.Arg66Trp      | Korean                 |
| 28          | 2016, Bravo-Gil et al.      | RP157-II:3         | HTZ    | c.197G>A              | p.Arg66Gln      | Spanish                |
| 11          | 2012, Koenekoop et al.      | MOGL3294           | HTZ    | c.199G>T              | p.Val67Phe      | Russian                |
| 10          | 2012, Perrault et al.       | P2                 | HTZ    | c.205A>G              | p.Met69Val      | Spain/France           |
| 10          | 2012, Perrault et al.       | P19                | HTZ    | c.205A>G              | p.Met69Val      | South Africa/France    |

|    |                            |                    |     |            |                  |                            |
|----|----------------------------|--------------------|-----|------------|------------------|----------------------------|
| 12 | 2012, Falk et al.          | CHOP/MEEI-053-II-1 | HTZ | c.205A>G   | p.Met69Val       | African American           |
| 12 | 2012, Falk et al.          | UCL-1-II-1         | HTZ | c.205A>G   | p.Met69Val       | European descent           |
| 12 | 2012, Falk et al.          | LVPEI-128-II-3     | HMZ | c.215T>A   | p.Leu72His       | Indian                     |
| 12 | 2012, Falk et al.          | LVPEI-128-II-3     | HMZ | c.215T>A   | p.Leu72His       | Indian                     |
| 23 | 2014, Siemiatkowska et al. | 2                  | HTZ | c.253T>C   | p.Trp85Arg       | German                     |
| 9  | 2012, Chiang et al.        | 9                  | HTZ | c.255G>A   | p.Trp85*         | Canada                     |
| 35 | 2018, Nash et al.          | Case 1             | HMZ | c.271G>A   | p.Glu91Lys       | Indian                     |
| 35 | 2018, Nash et al.          | Case 1             | HMZ | c.271G>A   | p.Glu91Lys       | Indian                     |
| 22 | 2014, Jin et al.           | Family035-II-2     | HTZ | c.272A>G   | p.Glu91Gly       | Chinese                    |
| 19 | 2020, Surl et al.          | 22                 | HTZ | c.275G>A   | p.Trp92*         | Korean                     |
| 11 | 2012, Koenekoop et al.     | MOGL3698           | HTZ | c.293T>A   | p.Val98Gly       | Haitian (African)          |
| 9  | 2012, Chiang et al.        | 5                  | HTZ | c.293T>G   | p.Val98Gly       | Brazil                     |
| 43 | 2020, Sallum, et al.       | 66.1               | HTZ | c.293T>G   | p.Val98Gly       | Brazilian                  |
| 12 | 2012, Falk et al.          | UCL-2-II-2         | HTZ | c.293T>G   | p.Val98Gly       | Caribbean & Sri Lankan     |
| 12 | 2012, Falk et al.          | UCL-3-II-1         | HTZ | c.293T>G   | p.Val98Gly       | Caribbean                  |
| 33 | 2017, Porto et al.         | 20-FBP_57          | HTZ | c.293T>G   | p.Val98Gly       | Brazilian                  |
| 43 | 2020, Sallum, et al.       | 63.1               | HTZ | c.293T>G   | p.Val98Gly       | Brazilian                  |
| 10 | 2012, Perrault et al.      | P22.1              | HTZ | c.319G>T   | p.Glu107*        | France                     |
| 10 | 2012, Perrault et al.      | P3                 | HTZ | c.362delA  | p.Glu121Glufs*20 | France                     |
| 10 | 2012, Perrault et al.      | P20                | HTZ | c.362delA  | p.Glu121Glufs*20 | France                     |
| 25 | 2015, Coppieters et al.    | F5                 | HTZ | c.364del   | p.Arg122fs       | NA                         |
| 17 | 2017, Tompson et al.       | -                  | HTZ | c.364del   | p.Arg122fs       | Australian                 |
| 17 | 2017, Tompson et al.       | -                  | HTZ | c.364del   | p.Arg122fs       | Australian                 |
| 10 | 2012, Perrault et al.      | P5                 | HTZ | c.439+1G>C | Splice           | France                     |
| 10 | 2012, Perrault et al.      | P4                 | HTZ | c.439G>C   | p.Ala147Pro      | France                     |
| 11 | 2012, Koenekoop et al.     | MOGL1269           | HTZ | c.451G>A   | p.Val151Phe      | European                   |
| 9  | 2012, Chiang et al.        | 6                  | HTZ | c.451G>T   | p.Val151Phe      | Canada                     |
| 9  | 2012, Chiang et al.        | 4                  | HTZ | c.457C>G   | p.Leu153Val      | Canada                     |
| 12 | 2012, Falk et al.          | UCL-7-II-1         | HTZ | c.466G>C   | p.Gly156Arg      | British (European descent) |
| 10 | 2012, Perrault et al.      | P18                | HTZ | c.468T>C   | p.Leu153Pro      | France                     |
| 23 | 2014, Siemiatkowska et al. | 1                  | HTZ | c.472G>C   | p.Asp158His      | German/French              |
| 16 | 2016, Wang et al.          | 22                 | HTZ | c.500A>G   | p.Asn167Ser      | Han Chinese                |
| 34 | 2018, Khan, et al.         | II-1               | HMZ | c.500A>G   | p.Asn167Ser      | Arab                       |
| 34 | 2018, Khan, et al.         | II-1               | HMZ | c.500A>G   | p.Asn167Ser      | Arab                       |
| 9  | 2012, Chiang et al.        | 1                  | HTZ | c.507G>A   | p.Trp169*        | Cherokee Indian            |
| 9  | 2012, Chiang et al.        | 2                  | HTZ | c.507G>A   | p.Trp169*        | Brazil                     |
| 9  | 2012, Chiang et al.        | 3                  | HTZ | c.507G>A   | p.Trp169*        | Brazil                     |
| 9  | 2012, Chiang et al.        | 11                 | HTZ | c.507G>A   | p.Trp169*        | Australian                 |
| 10 | 2012, Perrault et al.      | P21                | HMZ | c.507G>A   | p.Trp169*        | Algeria                    |
| 10 | 2012, Perrault et al.      | P24                | HTZ | c.507G>A   | p.Trp169*        | France                     |
| 11 | 2012, Koenekoop et al.     | MOGL3174           | HTZ | c.507G>A   | p.Trp169*        | Irish                      |
| 17 | 2017, Tompson et al.       | -                  | HTZ | c.507G>A   | p.Trp169*        | Australian                 |
| 43 | 2020, Sallum, et al.       | 65.1               | HTZ | c.507G>A   | p.Trp169Ter      | Brazilian                  |
| 43 | 2020, Sallum, et al.       | 67.1               | HTZ | c.507G>A   | p.Trp169Ter      | Brazilian                  |
| 10 | 2012, Perrault et al.      | P21                | HMZ | c.507G>A   | p.Trp169*        | Algeria                    |
| 10 | 2012, Perrault et al.      | P6                 | HTZ | c.518A>G   | p.Asp173Gly      | France                     |
| 10 | 2012, Perrault et al.      | P20                | HTZ | c.532G>A   | p.Val178Met      | France                     |
| 10 | 2012, Perrault et al.      | P7.1               | HTZ | c.542A>G   | p.Tyr181Cys      | France                     |
| 25 | 2015, Coppieters et al.    | F6                 | HTZ | c.542A>G   | p.Tyr181Cys      | NA                         |
| 32 | 2017, Di Iorio et al.      | 27                 | HTZ | c.542A>G   | p.Tyr181Cys      | Italy                      |
| 12 | 2012, Falk et al.          | UCL-6-II-1         | HTZ | c.552A>G   | p.Ile184Met      | British (European descent) |
| 42 | 2020, Hull et al.          |                    | HTZ | c.553T>C   | p.Cys185Arg      | New Zealand                |
| 25 | 2015, Coppieters et al.    | F8                 | HTZ | c.562C>T   | p.Arg188Trp      | NA                         |
| 12 | 2012, Falk et al.          | LVPEI-100-II-2     | HTZ | c.565delG  | p.Ala189Leufs*25 | Indian                     |
| 23 | 2014, Siemiatkowska et al. | 4                  | HTZ | c.595G>T   | p.Glu199*        | Danish                     |
| 23 | 2014, Siemiatkowska et al. | 3.1                | HTZ | c.617A>G   | p.His206Ala      | Dutch                      |
| 10 | 2012, Perrault et al.      | P8                 | HTZ | c.619C>T   | p.Arg207Trp      | France                     |
| 10 | 2012, Perrault et al.      | P9                 | HTZ | c.619C>T   | p.Arg207Trp      | France                     |
| 10 | 2012, Perrault et al.      | P10                | HTZ | c.619C>T   | p.Arg207Trp      | France                     |
| 10 | 2012, Perrault et al.      | P11.1              | HTZ | c.619C>T   | p.Arg207Trp      | France                     |
| 10 | 2012, Perrault et al.      | P12                | HTZ | c.619C>T   | p.Arg207Trp      | France                     |
| 10 | 2012, Perrault et al.      | P13                | HTZ | c.619C>T   | p.Arg207Trp      | France                     |
| 10 | 2012, Perrault et al.      | P14                | HTZ | c.619C>T   | p.Arg207Trp      | France                     |
| 11 | 2012, Koenekoop et al.     | MOGL512            | HTZ | c.619C>T   | p.Arg207Trp      | French Canadian            |
| 23 | 2014, Siemiatkowska et al. | 6                  | HTZ | c.619C>T   | p.Arg207Trp      | Dutch                      |
| 16 | 2016, Wang et al.          | 21                 | HTZ | c.619C>T   | p.Arg207Trp      | Han Chinese                |
| 29 | 2016, Xu et al.            | QT1118-II:1        | HTZ | c.619C>T   | p.Arg207Trp      | Chinese                    |
| 39 | 2020, Ruberto et al.       | 1                  | HTZ | c.619C>T   | p.Arg207Tyr?     | Italy                      |
| 24 | 2015, Wang et al.          | 94                 | HTZ | c.634G>A   | p.Val212Met      | Chinese                    |
| 29 | 2016, Xu et al.            | LH01-II:1          | HTZ | c.634G>A   | p.Val212Met      | Chinese                    |
| 16 | 2016, Wang et al.          | 19                 | HTZ | c.634G>A   | p.Val212Met      | Han Chinese                |
| 30 | 2017, Jinda et al.         | LCATH3             | HTZ | c.634G>A   | p.Val212Met      | Thai                       |

|    |                            |                    |     |                |                   |                              |
|----|----------------------------|--------------------|-----|----------------|-------------------|------------------------------|
| 10 | 2012, Perrault et al.      | P15                | HTZ | c.643G>T       | p.Glu215*         | France                       |
| 10 | 2012, Perrault et al.      | P19                | HTZ | c.650T>A       | p.Ile217Asn       | South Africa/France          |
| 16 | 2016, Wang et al.          | 22                 | HTZ | c.668C>T       | p.Ser223Phe       | Han Chinese                  |
| 25 | 2015, Coppieters et al.    | F7                 | HTZ | c.679C>T       | p.Arg227Trp       | NA                           |
| 16 | 2016, Wang et al.          | 18a                | HMZ | c.695G>A       | p.Arg232Lys       | NA                           |
| 16 | 2016, Wang et al.          | 18a                | HMZ | c.695G>A       | p.Arg232Lys       | Han Chinese                  |
| 12 | 2012, Falk et al.          | CHOP/MEEI-007-II-2 | HTZ | c.709C>T       | p.Arg237Cys       | Asian American               |
| 12 | 2012, Falk et al.          | LVPEI-100-II-2     | HTZ | c.709C>T       | p.Arg237Cys       | Indian                       |
| 24 | 2015, Wang et al.          | 120                | HTZ | c.709C>T       | p.Arg237Cys       | Cinese                       |
| 25 | 2015, Coppieters et al.    | F3-II:1            | HTZ | c.709C>T       | p.Arg237Cys       | Japanese                     |
| 25 | 2015, Coppieters et al.    | F4-II:1            | HTZ | c.709C>T       | p.Arg237Cys       | Japanese                     |
| 31 | 2017, Han et al.           | P6                 | HTZ | c.709C>T       | p.Arg237Cys       | Korean                       |
| 10 | 2012, Perrault et al.      | P22.1              | HTZ | c.709C>T       | p.Arg237Cys       | France                       |
| 31 | 2017, Han et al.           | P4                 | HTZ | c.709C>T       | p.Arg237Cys       | Korean                       |
| 31 | 2017, Han et al.           | P5                 | HTZ | c.709C>T       | p.Arg237Cys       | Korean                       |
| 18 | 2018, Hosono et al.        | EYE42              | HTZ | c.709C>T       | p.Arg237Cys       | Japanese                     |
| 18 | 2018, Hosono et al.        | EYE159             | HTZ | c.709C>T       | p.Arg237Cys       | Japanese                     |
| 18 | 2018, Hosono et al.        | S132               | HTZ | c.709C>T       | p.Arg237Cys       | Japanese                     |
| 19 | 2020, Surl et al.          | 22                 | HTZ | c.709C>T       | p.Arg237Cys       | Korean                       |
| 19 | 2020, Surl et al.          | 23                 | HTZ | c.709C>T       | p.Arg237Cys       | Korean                       |
| 19 | 2020, Surl et al.          | 24                 | HTZ | c.709C>T       | p.Arg237Cys       | Korean                       |
| 19 | 2020, Surl et al.          | 25                 | HTZ | c.709C>T       | p.Arg237Cys       | Korean                       |
| 19 | 2020, Surl et al.          | 26                 | HTZ | c.709C>T       | p.Arg237Cys       | Korean                       |
| 19 | 2020, Surl et al.          | 27                 | HTZ | c.709C>T       | p.Arg237Cys       | Korean                       |
| 19 | 2020, Surl et al.          | 28                 | HTZ | c.709C>T       | p.Arg237Cys       | Korean                       |
| 19 | 2020, Surl et al.          | 29                 | HTZ | c.709C>T       | p.Arg237Cys       | Korean                       |
| 19 | 2020, Surl et al.          | 30                 | HTZ | c.709C>T       | p.Arg237Cys       | Korean                       |
| 45 | 2021, Han et al.           | -                  | HTZ | c.709C>T       | p.Arg237Cys       | Korean                       |
| 24 | 2015, Wang et al.          | 600                | HTZ | c.713A>G       | p.Tyr238Cys       | Cinese                       |
| 24 | 2015, Wang et al.          | 120                | HTZ | c.713A>G       | p.Tyr238Cys       | Cinese                       |
| 10 | 2012, Perrault et al.      | P17                | HTZ | c.716T>C       | p.Leu239Ser       | France                       |
| 43 | 2020, Sallum, et al.       | 61.1               | HTZ | c.716T>C       | p.Leu239Ser       | Brazilian                    |
| 26 | 2015, Deng et al.          | II:2               | HMZ | c.721C>T       | p.Pro241Ser       | Chinese                      |
| 24 | 2015, Wang et al.          | 600                | HTZ | c.721C>T       | p.Pro241Ser       | Cinese                       |
| 26 | 2015, Deng et al.          | II:2               | HMZ | c.721C>T       | p.Pro241Ser       | Chinese                      |
| 16 | 2016, Wang et al.          | 20a                | HMZ | c.721C>T       | p.Pro241Ser       | Han Chinese                  |
| 16 | 2016, Wang et al.          | 20a                | HMZ | c.721C>T       | p.Pro241Ser       | Han Chinese                  |
| 16 | 2016, Wang et al.          | 21                 | HTZ | c.721C>T       | p.Pro241Ser       | Han Chinese                  |
| 29 | 2016, Xu et al.            | QT1118-II:1        | HTZ | c.721C>T       | p.Pro241Ser       | Chinese                      |
| 38 | 2020, Xu et al.            | -                  | HTZ | c.721C>T       | p.Pro241Ser       | Chinese                      |
| 12 | 2012, Falk et al.          | UCL-4-II-1         | HTZ | c.723delA      | p.Pro241Profs*45  | Caribbean & Irish            |
| 23 | 2014, Siemiatkowska et al. | 5                  | HTZ | c.731T>C       | p.Val244Ala       | German                       |
| 29 | 2016, Xu et al.            | LH05-II:1          | HMZ | c.737A>T       |                   | Chinese                      |
| 29 | 2016, Xu et al.            | LH05-II:1          | HMZ | c.737A>T       |                   | Chinese                      |
| 10 | 2012, Perrault et al.      | P16                | HTZ | c.752A>C       | p.His251Pro       | Spain                        |
| 43 | 2020, Sallum, et al.       | 64.1               | HTZ | c.759delGinsTA | p.Leu253PhefsTer5 | Brazilian                    |
| 10 | 2012, Perrault et al.      | P23.1              | HTZ | c.769G>A       | p.Glu257Lys       | Portugal                     |
| 10 | 2012, Perrault et al.      | P25                | HTZ | c.769G>A       | p.Glu257Lys       | France                       |
| 10 | 2012, Perrault et al.      | P26.1              | HTZ | c.769G>A       | p.Glu257Lys       | Portugal/La Leunion (France) |
| 10 | 2012, Perrault et al.      | P27                | HTZ | c.769G>A       | p.Glu257Lys       | France                       |
| 10 | 2012, Perrault et al.      | P28.1              | HTZ | c.769G>A       | p.Glu257Lys       | France                       |
| 10 | 2012, Perrault et al.      | P29                | HTZ | c.769G>A       | p.Glu257Lys       | La Leunion (France)          |
| 11 | 2012, Koenekoop et al.     | MOGL208            | HTZ | c.769G>A       | p.Glu257Lys       | French Canadian              |
| 11 | 2012, Koenekoop et al.     | MOGL624            | HMZ | c.769G>A       | p.Glu257Lys       | Saudi Arabian                |
| 39 | 2020, Ruberto et al.       | 16                 | HMZ | c.769G>A       | p.Glu257Lys       | Italy                        |
| 9  | 2012, Chiang et al.        | 1                  | HTZ | c.769G>A       | p.Glu257Lys       | Cherokee Indian              |
| 9  | 2012, Chiang et al.        | 2                  | HTZ | c.769G>A       | p.Glu257Lys       | Brazil                       |
| 9  | 2012, Chiang et al.        | 3                  | HTZ | c.769G>A       | p.Glu257Lys       | Brazil                       |
| 9  | 2012, Chiang et al.        | 4                  | HTZ | c.769G>A       | p.Glu257Lys       | Canada                       |
| 9  | 2012, Chiang et al.        | 5                  | HTZ | c.769G>A       | p.Glu257Lys       | Brazil                       |
| 9  | 2012, Chiang et al.        | 6                  | HTZ | c.769G>A       | p.Glu257Lys       | Canada                       |
| 9  | 2012, Chiang et al.        | 7                  | HTZ | c.769G>A       | p.Glu257Lys       | USA                          |
| 9  | 2012, Chiang et al.        | 9                  | HTZ | c.769G>A       | p.Glu257Lys       | Canada                       |
| 9  | 2012, Chiang et al.        | 11                 | HTZ | c.769G>A       | p.Glu257Lys       | Australian                   |
| 10 | 2012, Perrault et al.      | P1                 | HTZ | c.769G>A       | p.Glu257Lys       | Italy                        |
| 10 | 2012, Perrault et al.      | P2                 | HTZ | c.769G>A       | p.Glu257Lys       | Spain/France                 |
| 10 | 2012, Perrault et al.      | P3                 | HTZ | c.769G>A       | p.Glu257Lys       | France                       |
| 10 | 2012, Perrault et al.      | P4                 | HTZ | c.769G>A       | p.Glu257Lys       | France                       |
| 10 | 2012, Perrault et al.      | P5                 | HTZ | c.769G>A       | p.Glu257Lys       | France                       |
| 10 | 2012, Perrault et al.      | P6                 | HTZ | c.769G>A       | p.Glu257Lys       | France                       |
| 10 | 2012, Perrault et al.      | P7.1               | HTZ | c.769G>A       | p.Glu257Lys       | France                       |
| 10 | 2012, Perrault et al.      | P8                 | HTZ | c.769G>A       | p.Glu257Lys       | France                       |

|    |                              |                    |     |          |             |                            |
|----|------------------------------|--------------------|-----|----------|-------------|----------------------------|
| 10 | 2012, Perrault et al.        | P9                 | HTZ | c.769G>A | p.Glu257Lys | France                     |
| 10 | 2012, Perrault et al.        | P10                | HTZ | c.769G>A | p.Glu257Lys | France                     |
| 10 | 2012, Perrault et al.        | P11.1              | HTZ | c.769G>A | p.Glu257Lys | France                     |
| 10 | 2012, Perrault et al.        | P12                | HTZ | c.769G>A | p.Glu257Lys | France                     |
| 10 | 2012, Perrault et al.        | P13                | HTZ | c.769G>A | p.Glu257Lys | France                     |
| 10 | 2012, Perrault et al.        | P14                | HTZ | c.769G>A | p.Glu257Lys | France                     |
| 10 | 2012, Perrault et al.        | P15                | HTZ | c.769G>A | p.Glu257Lys | France                     |
| 10 | 2012, Perrault et al.        | P16                | HTZ | c.769G>A | p.Glu257Lys | Spain                      |
| 10 | 2012, Perrault et al.        | P17                | HTZ | c.769G>A | p.Glu257Lys | France                     |
| 11 | 2012, Koenekoop et al.       | MOGL512            | HTZ | c.769G>A | p.Glu257Lys | French Canadian            |
| 11 | 2012, Koenekoop et al.       | MOGL1269           | HTZ | c.769G>A | p.Glu257Lys | European                   |
| 11 | 2012, Koenekoop et al.       | MOGL624            | HMZ | c.769G>A | p.Glu257Lys | Saudi Arabian              |
| 11 | 2012, Koenekoop et al.       | MOGL3294           | HTZ | c.769G>A | p.Glu257Lys | Russian                    |
| 12 | 2012, Falk et al.            | CHOP/MEEI-053-II-1 | HTZ | c.769G>A | p.Glu257Lys | African American           |
| 12 | 2012, Falk et al.            | UCL-1-II-1         | HTZ | c.769G>A | p.Glu257Lys | European descent           |
| 12 | 2012, Falk et al.            | UCL-4-II-1         | HTZ | c.769G>A | p.Glu257Lys | Caribbean & Irish          |
| 12 | 2012, Falk et al.            | UCL-5-II-2         | HTZ | c.769G>A | p.Glu257Lys | Polish                     |
| 12 | 2012, Falk et al.            | UCL-6-II-1         | HTZ | c.769G>A | p.Glu257Lys | British (European descent) |
| 12 | 2012, Falk et al.            | UCL-7-II-1         | HTZ | c.769G>A | p.Glu257Lys | British (European descent) |
| 23 | 2014, Siemiatkowska et al.   | 2                  | HTZ | c.769G>A | p.Glu257Lys | German                     |
| 23 | 2014, Siemiatkowska et al.   | 3.1                | HTZ | c.769G>A | p.Glu257Lys | Dutch                      |
| 23 | 2014, Siemiatkowska et al.   | 4                  | HTZ | c.769G>A | p.Glu257Lys | Danish                     |
| 23 | 2014, Siemiatkowska et al.   | 5                  | HTZ | c.769G>A | p.Glu257Lys | German                     |
| 23 | 2014, Siemiatkowska et al.   | 6                  | HTZ | c.769G>A | p.Glu257Lys | Dutch                      |
| 25 | 2015, Coppieters et al.      | F5                 | HTZ | c.769G>A | p.Glu257Lys | NA                         |
| 25 | 2015, Coppieters et al.      | F6                 | HTZ | c.769G>A | p.Glu257Lys | NA                         |
| 25 | 2015, Coppieters et al.      | F7                 | HTZ | c.769G>A | p.Glu257Lys | NA                         |
| 28 | 2016, Bravo-Gil et al.       | RP157-II:3         | HTZ | c.769G>A | p.Glu257Lys | Spanish                    |
| 17 | 2017, Tompson et al.         | -                  | HTZ | c.769G>A | p.Glu257Lys | Australian                 |
| 17 | 2017, Tompson et al.         | -                  | HTZ | c.769G>A | p.Glu257Lys | Australian                 |
| 17 | 2017, Tompson et al.         | -                  | HTZ | c.769G>A | p.Glu257Lys | Australian                 |
| 35 | 2018, Nash et al.            | Case 2             | HTZ | c.769G>A | p.Glu257Lys | Caucasian                  |
| 37 | 2018, Weisschuh, et al.      | 10                 | HTZ | c.769G>A | p.Glu257Lys | German                     |
| 39 | 2020, Ruberto et al.         | 1                  | HTZ | c.769G>A | p.Glu257Lys | Italy                      |
| 39 | 2020, Ruberto et al.         | 16                 | HMZ | c.769G>A | p.Glu257Lys | Italy                      |
| 42 | 2020, Hull et al.            | -                  | HTZ | c.769G>A | p.Glu257Lys | New Zealand                |
| 43 | 2020, Sallum, et al.         | 61.1               | HTZ | c.769G>A | p.Glu257Lys | Brazilian                  |
| 43 | 2020, Sallum, et al.         | 62.1               | HTZ | c.769G>A | p.Glu257Lys | Brazilian                  |
| 43 | 2020, Sallum, et al.         | 65.1               | HTZ | c.769G>A | p.Glu257Lys | Brazilian                  |
| 43 | 2020, Sallum, et al.         | 66.1               | HTZ | c.769G>A | p.Glu257Lys | Brazilian                  |
| 43 | 2020, Sallum, et al.         | 67.1               | HTZ | c.769G>A | p.Glu257Lys | Brazilian                  |
| 44 | 2020, Skorczyk-Werner et al. | 9-29               | HTZ | c.769G>A | p.Glu257Lys | Polish                     |
| 44 | 2020, Skorczyk-Werner et al. | 19-47              | HTZ | c.769G>A | p.Glu257Lys | Polish                     |
| 9  | 2012, Chiang et al.          | 4                  | HTZ | c.817A>G | p.Asn273Asp | Canada                     |
| 11 | 2012, Koenekoop et al.       | MOGL208            | HTZ | c.817A>G | p.Asn273Asp | French Canadian            |
| 11 | 2012, Koenekoop et al.       | LCA9 IV:8          | HMZ | c.838T>C | p.*280Gln   | Pakistani                  |
| 11 | 2012, Koenekoop et al.       | LCA9 IV:8          | HMZ | c.838T>C | p.*280Gln   | Pakistani                  |

---

HMZ: homozygous, HTZ: heterozygous, NA: not available

---

The variants are transcribed exactly as presented in the original article.

---
