# Supplementary material
Source: publisher figshare collection journal article supplement (https://tandf.figshare.com/articles/dataset/_/18393669)
Supplement: Supplementary file 2 [file 2]

Supplementary Table 1.  
Summary of the genetic and clinical findings of the *NMNA1*-associated retinopathy

| Reference # | Published year, Authors | Patient #          | Status | Variant 1            | Variant 1                  | Variant 2 | Variant 2   | Ethnicity                                                            | Age            | Gender | Macular degeneration                             | Optic disk atrophy                               | Retinal degeneration | Visual acuity                                                                  | Refractive errors  | Electro-retinogram  | Others                                                                                                                         |
|-------------|-------------------------|--------------------|--------|----------------------|----------------------------|-----------|-------------|----------------------------------------------------------------------|----------------|--------|--------------------------------------------------|--------------------------------------------------|----------------------|--------------------------------------------------------------------------------|--------------------|---------------------|--------------------------------------------------------------------------------------------------------------------------------|
| 9           | 2012, Chiang et al.     | 1                  | HTZ    | c.507G>A             | p.Trp169*                  | c.769G>A  | p.Glu257Lys | Cherokee Indian, Asian, Hispanic, Caucasian                          | several months | M      | Yes                                              | NA                                               | Yes                  | LP, lack of vision several hours after birth                                   | NA                 | non-recordable      |                                                                                                                                |
| 9           | 2012, Chiang et al.     | 2                  | HTZ    | c.507G>A             | p.Trp169*                  | c.769G>A  | p.Glu257Lys | Brazil Caucasian (Poland, Portugal, Lebanon, Italy, Turkey, Germany) | 6m             | M      | Yes                                              | NA                                               | Yes                  | NLP                                                                            | NA                 | NA                  | nystagmus                                                                                                                      |
| 9           | 2012, Chiang et al.     | 3                  | HTZ    | c.507G>A             | p.Trp169*                  | c.769G>A  | p.Glu257Lys | Brazil                                                               | 4m             | F      | Yes                                              | NA                                               | Yes                  | NP-NLP                                                                         | NA                 | NA                  | oculo-digital sign                                                                                                             |
| 9           | 2012, Chiang et al.     | 4                  | HTZ    | c.457C>G<br>c.817A>G | p.Leu153Val<br>p.Asn273Asp | c.769G>A  | p.Glu257Lys | Canada                                                               | 6m             | M      | Yes                                              | NA                                               | Yes                  | 20/200 can see colors                                                          | NA                 | cone dysfunction    | cone-rod dysfunction, poor night vision                                                                                        |
| 9           | 2012, Chiang et al.     | 5                  | HTZ    | c.293T>G             | p.Val98Gly                 | c.769G>A  | p.Glu257Lys | Brazil                                                               | 1              | M      | Yes                                              | NA                                               | Yes                  | no fixation<br>able to see colors and shapes until 22 & 24 y.o., LP at 26 y.o. | NA                 | NA                  | Coats' disease OS at age 4 years                                                                                               |
| 9           | 2012, Chiang et al.     | 6                  | HTZ    | c.451G>T             | p.Val151Phe                | c.769G>A  | p.Glu257Lys | Canada                                                               | 6m             | F      | Yes                                              | NA                                               | Yes                  | LP                                                                             | NA                 | profoundly abnormal | MD and relatively normal peripheral retina, later MD enlarged                                                                  |
| 9           | 2012, Chiang et al.     | 7                  | HTZ    | c.104T>C             | p.Met35Thr                 | c.769G>A  | p.Glu257Lys | USA                                                                  | 10             | F      | Yes                                              | NA                                               | NA                   | no fixation                                                                    | NA                 | profoundly abnormal | roving eye                                                                                                                     |
| 9           | 2012, Chiang et al.     | 8                  | HTZ    | c.255G>A             | p.Trp85*                   | c.769G>A  | p.Glu257Lys | Canada                                                               | 1              | M      | NA                                               | NA                                               | NA                   | color vision lost thereafter, LP at age 22.                                    | NA                 | NA                  |                                                                                                                                |
| 9           | 2012, Chiang et al.     | 9                  | HTZ    | c.507G>A             | p.Trp169*                  | c.769G>A  | p.Glu257Lys | Australian, English                                                  | 21             | M      | Yes                                              | NA                                               | Yes                  | LP                                                                             | NA                 | severe dysfunction  | nystagmus and roving eye                                                                                                       |
| 9           | 2012, Chiang et al.     | 10                 | HTZ    | c.1A>G               | p.Met1?                    | c.769G>A  | p.Glu257Lys | Italy                                                                | 30             | M      | NA                                               | NA                                               | NA                   | LP                                                                             | NA                 | NA                  |                                                                                                                                |
| 9           | 2012, Perrault et al.   | 11                 | HTZ    | c.205A>G             | p.Met69Val                 | c.769G>A  | p.Glu257Lys | Spain/France                                                         | 8w?            | F      | Yes                                              | NA                                               | NA                   | LP                                                                             | NA                 | NA                  |                                                                                                                                |
| 10          | 2012, Perrault et al.   | P1                 | HTZ    | c.362delA            | p.Glu121Glufs'             | c.769G>A  | p.Glu257Lys | France                                                               | 19             | M      | Yes                                              | NA                                               | NA                   | HM                                                                             | high hyperopia     | NA                  |                                                                                                                                |
| 10          | 2012, Perrault et al.   | P2                 | HTZ    | c.439G>C             | p.Ala147Pro                | c.769G>A  | p.Glu257Lys | France                                                               | 15             | F      | NA                                               | NA                                               | NA                   | LP                                                                             | NA                 | NA                  | photophobia                                                                                                                    |
| 10          | 2012, Perrault et al.   | P3                 | HTZ    | c.439G>C             | p.Ala147Pro                | c.769G>A  | p.Glu257Lys | France                                                               | 3              | M      | Yes                                              | NA                                               | NA                   | LP                                                                             | NA                 | NA                  | photophobia, neonatal and fast progressing macular atrophy                                                                     |
| 10          | 2012, Perrault et al.   | P4                 | HTZ    | c.439G>C             | p.Ala147Pro                | c.769G>A  | p.Glu257Lys | France                                                               | 9              | M      | Yes                                              | Yes                                              | Yes                  | LP                                                                             | +7/+8              | NA                  | night blindness                                                                                                                |
| 10          | 2012, Perrault et al.   | P5                 | HTZ    | c.439G>C             | p.Ala147Pro                | c.769G>A  | p.Glu257Lys | France                                                               | 12             | F      | Yes                                              | NA                                               | NA                   | NLP/LE                                                                         | +9.5/+7.75         | NA                  | photophobia                                                                                                                    |
| 10          | 2012, Perrault et al.   | P6                 | HTZ    | c.518A>G             | p.Asp173Gly                | c.769G>A  | p.Glu257Lys | France                                                               | 19             | F      | Yes                                              | NA                                               | NA                   | LP                                                                             | +4                 | NA                  | photophobia                                                                                                                    |
| 10          | 2012, Perrault et al.   | P7.1               | HTZ    | c.542A>G             | p.Tyr181Cys                | c.769G>A  | p.Glu257Lys | France                                                               | 59             | M      | invisible due to cataract                        | invisible due to cataract                        | NA                   | NLP                                                                            | hyperopia          | NA                  | cataract                                                                                                                       |
| 10          | 2012, Perrault et al.   | P7.2               | HTZ    | c.542A>G             | p.Tyr181Cys                | c.769G>A  | p.Glu257Lys | France                                                               | 60             | M      | invisible due to cataract                        | invisible due to cataract                        | NA                   | NLP                                                                            | hyperopia          | NA                  | cataract                                                                                                                       |
| 10          | 2012, Perrault et al.   | P8                 | HTZ    | c.619C>T             | p.Arg207Trp                | c.769G>A  | p.Glu257Lys | France                                                               | 6              | F      | Yes                                              | NA                                               | NA                   | 1/20                                                                           | +5.5/+4.5          | NA                  |                                                                                                                                |
| 10          | 2012, Perrault et al.   | P9                 | HTZ    | c.619C>T             | p.Arg207Trp                | c.769G>A  | p.Glu257Lys | France                                                               | 19             | M      | Yes                                              | NA                                               | NA                   | CF                                                                             | +3/+0.75           | NA                  | photophobia and night blindness                                                                                                |
| 10          | 2012, Perrault et al.   | P10                | HTZ    | c.619C>T             | p.Arg207Trp                | c.769G>A  | p.Glu257Lys | France                                                               | 9              | F      | Yes                                              | NA                                               | NA                   | <1/10                                                                          | +8.25/+9.75        | NA                  | moderate photophobia                                                                                                           |
| 10          | 2012, Perrault et al.   | P11.1              | HTZ    | c.619C>T             | p.Arg207Trp                | c.769G>A  | p.Glu257Lys | France                                                               | 24             | M      | Yes                                              | Yes                                              | Yes                  | CF                                                                             | +2/+3.5            | NA                  |                                                                                                                                |
| 10          | 2012, Perrault et al.   | P11.2              | HTZ    | c.619C>T             | p.Arg207Trp                | c.769G>A  | p.Glu257Lys | France                                                               | 20             | M      | Yes                                              | Yes                                              | Yes                  | CF                                                                             | +2/+3.5            | NA                  |                                                                                                                                |
| 10          | 2012, Perrault et al.   | P12                | HTZ    | c.619C>T             | p.Arg207Trp                | c.769G>A  | p.Glu257Lys | France                                                               | 45             | F      | NA                                               | NA                                               | NA                   | 1/20                                                                           | NA                 | NA                  |                                                                                                                                |
| 10          | 2012, Perrault et al.   | P13                | HTZ    | c.619C>T             | p.Arg207Trp                | c.769G>A  | p.Glu257Lys | France                                                               | 31             | M      | NA                                               | NA                                               | NA                   | NA                                                                             | NA                 | NA                  |                                                                                                                                |
| 10          | 2012, Perrault et al.   | P14                | HTZ    | c.619C>T             | p.Arg207Trp                | c.769G>A  | p.Glu257Lys | France                                                               | 49             | M      | Yes                                              | Yes                                              | Yes                  | <1/20                                                                          | +8/+8              | NA                  | night blindness                                                                                                                |
| 10          | 2012, Perrault et al.   | P15                | HTZ    | c.643G>T             | p.Glu215*                  | c.769G>A  | p.Glu257Lys | France                                                               | 6              | M      | Yes                                              | NA                                               | NA                   | NLP                                                                            | +4/+5              | NA                  | sun photophobia                                                                                                                |
| 10          | 2012, Perrault et al.   | P16                | HTZ    | c.752A>C             | p.His251Pro                | c.769G>A  | p.Glu257Lys | Spain                                                                | 24             | F      | Yes                                              | Yes                                              | Yes                  | LP                                                                             | +2.25/+6.75        | NA                  | photophobia                                                                                                                    |
| 10          | 2012, Perrault et al.   | P17                | HTZ    | c.716T>C             | p.Leu239Ser                | c.769G>A  | p.Glu257Lys | France                                                               | 28             | F      | NA                                               | NA                                               | NA                   | CF                                                                             | NA                 | NA                  | photophobia                                                                                                                    |
| 10          | 2012, Perrault et al.   | P18                | HTZ    | c.37G>A              | p.Ala13Thr                 | c.468T>C  | p.Leu153Pro | France                                                               | 12             | M      | Yes                                              | NA                                               | NA                   | LP                                                                             | +6/+7              | NA                  | photophobia                                                                                                                    |
| 10          | 2012, Perrault et al.   | P19                | HTZ    | c.205A>G             | p.Met69Val                 | c.650T>A  | p.Ile217Asn | South Africa/France                                                  | 3              | M      | None                                             | Yes                                              | Yes                  | NLP                                                                            | NA                 | NA                  |                                                                                                                                |
| 10          | 2012, Perrault et al.   | P20                | HTZ    | c.362delA            | p.Glu121Glufs'             | c.532G>A  | p.Val178Met | France                                                               | 1              | F      | Yes                                              | Yes                                              | Yes                  | LP                                                                             | +6.75/+7           | NA                  | photophobia                                                                                                                    |
| 10          | 2012, Perrault et al.   | P21                | HMZ    | c.507G>A             | p.Trp169*                  | c.507G>A  | p.Trp169*   | Algeria                                                              | 16             | F      | Yes                                              | NA                                               | NA                   | CF                                                                             | high hyperopia     | NA                  | night blindness                                                                                                                |
| 10          | 2012, Perrault et al.   | P22.1              | HTZ    | c.319G>T             | p.Glu107*                  | c.709C>T  | p.Arg237Cys | France                                                               | 18             | M      | invisible due to retinal detachment and cataract | invisible due to retinal detachment and cataract | NA                   | NLP                                                                            | NA                 | NA                  | retinal detachment and cataract                                                                                                |
| 10          | 2012, Perrault et al.   | P22.2              | HTZ    | c.319G>T             | p.Glu107*                  | c.709C>T  | p.Arg237Cys | France                                                               | 13             | F      | invisible due to ocular phytis and cataract      | invisible due to ocular phytis and cataract      | NA                   | NLP                                                                            | NA                 | NA                  | retinal detachment and cataract                                                                                                |
| 10          | 2012, Perrault et al.   | P23.1              | HTZ    | c.769G>A             | p.Glu257Lys                | ?         | ?           | Portugal                                                             | NA             | NA     | Yes                                              | NA                                               | Yes                  | NA                                                                             | +6                 | NA                  |                                                                                                                                |
| 10          | 2012, Perrault et al.   | P24                | HTZ    | c.507G>A             | p.Trp169*                  | ?         | ?           | France                                                               | 22             | NA     | Yes                                              | NA                                               | Yes                  | CF                                                                             | +3/+3.75           | NA                  | photophobia                                                                                                                    |
| 10          | 2012, Perrault et al.   | P25                | HTZ    | c.769G>A             | p.Glu257Lys                | ?         | ?           | France                                                               | 8              | NA     | Yes                                              | NA                                               | NA                   | LP                                                                             | NA                 | NA                  |                                                                                                                                |
| 10          | 2012, Perrault et al.   | P26.1              | HTZ    | c.769G>A             | p.Glu257Lys                | ?         | ?           | Portugal/La                                                          | 28             | NA     | Yes                                              | Yes                                              | Yes                  | LP                                                                             | NA                 | NA                  | photophobia                                                                                                                    |
| 10          | 2012, Perrault et al.   | P26.2              | HTZ    | c.769G>A             | p.Glu257Lys                | ?         | ?           | Leunion (Fr)                                                         | 24             | NA     | Yes                                              | Yes                                              | Yes                  | NLP                                                                            | NA                 | NA                  |                                                                                                                                |
| 10          | 2012, Perrault et al.   | P27                | HTZ    | c.769G>A             | p.Glu257Lys                | ?         | ?           | France                                                               | 3              | NA     | Yes                                              | NA                                               | Yes                  | LP                                                                             | +5                 | NA                  | photophobia                                                                                                                    |
| 10          | 2012, Perrault et al.   | P28.1              | HTZ    | c.769G>A             | p.Glu257Lys                | ?         | ?           | France                                                               | 6              | NA     | Yes                                              | NA                                               | NA                   | NLP                                                                            | NA                 | NA                  |                                                                                                                                |
| 10          | 2012, Perrault et al.   | P29                | HTZ    | c.769G>A             | p.Glu257Lys                | ?         | ?           | La Leunion (Fr)                                                      | NA             | NA     | NA                                               | NA                                               | NA                   | NLP                                                                            | NA                 | NA                  | photophobia                                                                                                                    |
| 11          | 2012, Koenekoop et al.  | MOGL208            | HTZ    | c.769G>A             | p.Glu257Lys                | c.817A>G  | p.Asn273Asp | French Candadian                                                     | 56             | F      | Yes                                              | Yes                                              | Yes                  | NLP/CF                                                                         | hyperopia          | NA                  | nystagmus                                                                                                                      |
| 11          | 2012, Koenekoop et al.  | MOGL512            | HTZ    | c.619C>T             | p.Arg207Trp                | c.769G>A  | p.Glu257Lys | French Candadian                                                     | 13             | M      | Yes                                              | Yes                                              | Yes                  | CF                                                                             | hyperopia          | NA                  | nystagmus                                                                                                                      |
| 11          | 2012, Koenekoop et al.  | MOGL1269           | HTZ    | c.451G>A             | p.Val151Phe                | c.769G>A  | p.Glu257Lys | European                                                             | NA             | F      | NA                                               | NA                                               | NA                   | NA                                                                             | NA                 | NA                  |                                                                                                                                |
| 11          | 2012, Koenekoop et al.  | MOGL624            | HMZ    | c.769G>A             | p.Glu257Lys                | c.769G>A  | p.Glu257Lys | Saudi Arabian                                                        | 10             | M      | Yes                                              | Yes                                              | Yes                  | NLP                                                                            | hyperopia          | NA                  | nystagmus                                                                                                                      |
| 11          | 2012, Koenekoop et al.  | MOGL3174           | HTZ    | c.507G>A             | p.Trp169*                  | ?         | ?           | Irish                                                                | 33             | F      | Yes                                              | Yes                                              | Yes                  | 20/2000                                                                        | hyperopia          | NA                  | nystagmus                                                                                                                      |
| 11          | 2012, Koenekoop et al.  | MOGL3294           | HTZ    | c.199G>T             | p.Val67Phe                 | c.769G>A  | p.Glu257Lys | Russian                                                              | 41             | NA     | Yes                                              | Yes                                              | Yes                  | CF                                                                             | hyperopia          | NA                  | nystagmus                                                                                                                      |
| 11          | 2012, Koenekoop et al.  | MOGL3698           | HTZ    | c.37G>A              | p.Ala13Thr                 | c.293T>A  | p.Val98Gly  | Haitian (African)                                                    | 10             | NA     | Yes                                              | Yes                                              | Yes                  | CF                                                                             | hyperopia          | NA                  | nystagmus                                                                                                                      |
| 11          | 2012, Koenekoop et al.  | LCA9 IV:8          |        |                      |                            |           |             |                                                                      |                | F      | Yes                                              | Yes                                              | Yes                  |                                                                                |                    |                     |                                                                                                                                |
| 11          | 2012, Koenekoop et al.  | LCA9 IV:9          |        |                      |                            |           |             |                                                                      |                | F      | Yes                                              | Yes                                              | Yes                  |                                                                                |                    |                     |                                                                                                                                |
| 11          | 2012, Koenekoop et al.  | LCA9 IV:11         |        |                      |                            |           |             |                                                                      |                | F      | Yes                                              | Yes                                              | Yes                  |                                                                                |                    |                     |                                                                                                                                |
| 11          | 2012, Koenekoop et al.  | LCA9 IV:12         | HMZ    | c.838T>C             | p.*280Gln                  | c.838T>C  | p.*280Gln   | Pakistani                                                            | 2-30           | F      | Yes                                              | NA                                               | Yes                  | LP-NLP                                                                         | NA                 | NA                  | nystagmus, night blindness, cataract (posterior subcapsular), one has keratoconus                                              |
| 11          | 2012, Koenekoop et al.  | LCA9 IV:13         |        |                      |                            |           |             |                                                                      |                | M      | Yes                                              | NA                                               | Yes                  |                                                                                |                    |                     |                                                                                                                                |
| 11          | 2012, Koenekoop et al.  | LCA9 IV:16         |        |                      |                            |           |             |                                                                      |                | F      | Yes                                              | NA                                               | Yes                  |                                                                                |                    |                     |                                                                                                                                |
| 11          | 2012, Koenekoop et al.  | LCA9 IV:17         |        |                      |                            |           |             |                                                                      |                | F      | Yes                                              | NA                                               | Yes                  |                                                                                |                    |                     |                                                                                                                                |
| 11          | 2012, Koenekoop et al.  | LCA9 IV:18         |        |                      |                            |           |             |                                                                      |                | F      | Yes                                              | NA                                               | Yes                  |                                                                                |                    |                     |                                                                                                                                |
| 12          | 2012, Falk et al.       | CHOP/MEEI-047-IV-1 |        |                      |                            |           |             |                                                                      | 11             | F      | Yes                                              | Yes                                              | Yes                  | not fix or follow objects                                                      | NA                 | non-recordable      | enophthalmos, corneal opacity OS, sensorineural hearing loss, developmental delay, non-verbal autism (GJB2 mutations combined) |
| 12          | 2012, Falk et al.       | CHOP/MEEI-047-IV-3 | HMZ    | c.25G>A              | p.Val9Met                  | c.25G>A   | p.Val9Met   | Pakistani                                                            | 4m             | M      | Yes(3y)                                          | mild                                             | Yes                  | LP > NLP                                                                       | significant myopia | non-recordable      | enophthalmos, neural development delay, non-verbal at age 4, autism, normal hearing                                            |
| 12          | 2012, Falk et al.       | CHOP/MEEI-047-IV-6 |        |                      |                            |           |             |                                                                      | NA             | M      | NA                                               | NA                                               | NA                   | congenital blindness                                                           | NA                 | NA                  | LCA without developmetal delay                                                                                                 |
| 12          | 2012, Falk et al.       | CHOP/MEEI-047-IV-7 |        |                      |                            |           |             |                                                                      | NA             | F      | NA                                               | NA                                               | NA                   | congenital blindness                                                           | NA                 | NA                  | hearing loss and developmental delay (GJB2 mutations combined)                                                                 |
| 12          | 2012, Falk et al.       | CHOP/MEEI-047-IV-8 |        |                      |                            |           |             |                                                                      | NA             | M      | NA                                               | NA                                               | NA                   | congenital blindness                                                           | NA                 | NA                  | hearing loss and developmental delay (GJB2 mutations combined)                                                                 |

|    |                            |                    |     |                   |                |                       |                  |                            |      |    |      |               |                      |                               |               |                      |                                                                      |
|----|----------------------------|--------------------|-----|-------------------|----------------|-----------------------|------------------|----------------------------|------|----|------|---------------|----------------------|-------------------------------|---------------|----------------------|----------------------------------------------------------------------|
| 12 | 2012, Falk et al.          | CHOP/MEEI-007-II-2 | HTZ | c.196C>T          | p.Arg66Trp     | c.709C>T              | p.Arg237Cys      | Asian American             | 3    | F  | Yes  | Yes           | Yes                  | LP at age 4                   | NA            | NA                   | significant fixing and following at age 3                            |
| 12 | 2012, Falk et al.          | CHOP/MEEI-053-II-1 | HTZ | c.205A>G          | p.Met69Val     | c.769G>A              | p.Glu257Lys      | African American           | 20   | F  | Yes  | Yes           | Yes                  | NLP                           | NA            | non-recordable       | 33-week's gestational age, developmental delay                       |
| 12 | 2012, Falk et al.          | LVPEI-73-II-2      | HMZ | c.25G>A           | p.Val9Met      | c.25G>A               | p.Val9Met        | Indian                     | 5m   | NA | Yes  | minimal       | Yes                  | fixing on and following light | NA            | NA                   |                                                                      |
| 12 | 2012, Falk et al.          | LVPEI-79-IV-1      | HMZ | c.98A>G           | p.Asp33Gly     | c.98A>G               | p.Asp33Gly       | Indian                     | 1    | NA | Yes  | moderate      | Yes                  | LP                            | NA            | NA                   | motor developmental delay and it was improved                        |
| 12 | 2012, Falk et al.          | LVPEI-100-II-2     | HTZ | c.709C>T          | p.Arg237Cys    | c.565delG             | p.Ala189Leufs*25 | Indian                     | 3m   | NA | Yes  | minimal       | Yes                  | following and fixing light    | +9            | NA                   | 7-year follow-up                                                     |
| 12 | 2012, Falk et al.          | LVPEI-128-II-3     | HMZ | c.215T>A          | p.Leu72His     | c.215T>A              | p.Leu72His       | Indian                     | 28   | M  | Yes  | minimal       | moderate             | 20/280, 20/150                | NA            | NA                   |                                                                      |
| 12 | 2012, Falk et al.          | UCL-1-II-1         | HTZ | c.205A>G          | p.Met69Val     | c.769G>A              | p.Glu257Lys      | Caucasian descent          | 4    | F  | Yes  | Yes           | Yes                  | NLP                           | +11           | non-recordable       |                                                                      |
| 12 | 2012, Falk et al.          | UCL-2-II-2         | HTZ | c.161C>T          | p.Ala54Val     | c.293T>G              | p.Val98Gly       | Caribbean & Sri Lankan     | 13m  | F  | Yes  | NA            | Yes                  | LP                            | +3            | non-recordable       |                                                                      |
| 12 | 2012, Falk et al.          | UCL-3-II-1         | HTZ | c.37G>A           | p.Ala13Thr     | c.293T>G              | p.Val98Gly       | Caribbean                  | 10   | F  | Yes  | NA            | Yes                  | 1.5 logMAR                    | +3/+5         | non-recordable       |                                                                      |
| 12 | 2012, Falk et al.          | UCL-4-II-1         | HTZ | c.723delA         | p.Pro241Profs* | c.769G>A              | p.Glu257Lys      | Caribbean & Irish          | 13m  | M  | Yes  | NA            | Yes                  | LP                            | +6.5/+6.5     | non-recordable       |                                                                      |
| 12 | 2012, Falk et al.          | UCL-5-II-2         | HTZ | c.59T>A           | p.Ile20Asn     | c.769G>A              | p.Glu257Lys      | Polish                     | 18m  | F  | Yes  | NA            | Yes                  | LP                            | +6/+6         | non-recordable       | enophthalmos, older sibling was developmentally delay                |
| 12 | 2012, Falk et al.          | UCL-6-II-1         | HTZ | c.552A>G          | p.Ile184Met    | c.769G>A              | p.Glu257Lys      | British (European descent) | 41   | M  | Yes  | NA            | Yes                  | HM/HM                         | NA            | NA                   | IOL OU                                                               |
| 12 | 2012, Falk et al.          | UCL-7-II-1         | HTZ | c.466G>C          | p.Gly156Arg    | c.769G>A              | p.Glu257Lys      | British (European descent) | 36m  | M  | Yes  | Yes           | Yes                  | NLP                           | NA            | non-recordable       |                                                                      |
| 22 | 2014, Jin et al.           | Family-035-II:2    | HTZ | c.196C>T          | p.Arg66Trp     | c.272A>G              | p.Glu91Gly       | Chinese                    | 6    | F  | Yes  | Yes           | Yes                  | HM                            | NA            | non-recordable       | normal mental/physical health                                        |
| 22 | 2014, Jin et al.           | Family-035-II:3    | HTZ | c.196C>T          | p.Arg66Trp     | c.272A>G              | p.Glu91Gly       | Chinese                    | 8    | M  | Yes  | Yes           | Yes                  | HM                            | NA            | non-recordable       | normal mental/physical health                                        |
| 23 | 2014, Siemiatkowska et al. | 1                  | HTZ | c.53A>G           | p.Asn18Ser     | c.472G>C              | p.Asp158His      | German/French              | 23   | M  | Yes  | None          | Yes                  | LP                            | +7/+7.5       | non-recordable       | cataract (PSC)                                                       |
| 23 | 2014, Siemiatkowska et al. | 2                  | HTZ | c.253T>C          | p.Trp85Arg     | c.769G>A              | p.Glu257Lys      | German                     | 25   | F  | Yes  | Yes           | Yes                  | LP                            | not performed | non-recordable       | none                                                                 |
| 23 | 2014, Siemiatkowska et al. | 3.1                | HTZ | c.617A>G          | p.His206Ala    | c.769G>A              | p.Glu257Lys      | Dutch                      | 7    | M  | Yes  | None          | Yes (subtle)         | 2/60                          | +3            | non-recordable       | none                                                                 |
| 23 | 2014, Siemiatkowska et al. | 3.2                | HTZ | c.617A>G          | p.His206Ala    | c.769G>A              | p.Glu257Lys      | Dutch                      | 2    | F  | Yes  | NA            | Yes                  | LP                            | +6.5          | not performed        | none                                                                 |
| 23 | 2014, Siemiatkowska et al. | 4                  | HTZ | c.595G>T          | p.Glu199*      | c.769G>A              | p.Glu257Lys      | Danish                     | 64   | M  | None | None          | Yes                  | NLP                           | not performed | not performed        | keratoconus                                                          |
| 23 | 2014, Siemiatkowska et al. | 5                  | HTZ | c.731T>C          | p.Val244Ala    | c.769G>A              | p.Glu257Lys      | German                     | 16   | F  | Yes  | NA            | None                 | LP                            | -0.25         | non-recordable       | none                                                                 |
| 23 | 2014, Siemiatkowska et al. | 6                  | HTZ | c.619C>T          | p.Arg207Trp    | c.769G>A              | p.Glu257Lys      | Dutch                      | 72   | M  | Yes  | Yes           | Yes                  | LP/HM                         | not performed | non-recordable       | panretinal degeneration                                              |
| 24 | 2015, Wang et al.          | SRF120             | HTZ | c.709C>T          | p.Arg237Cys    | c.713A>G              | p.Tyr238Cys      | Cinese                     | 22   | M  | Yes  | NA            | Yes                  | LP/LP                         | myopia        | NA                   | keratoconus, nystagmus                                               |
| 24 | 2015, Wang et al.          | SRF94              | HTZ | c.116-2A>G        | c.634G>A       | c.634G>A              | p.Val212Met      | Cinese                     | 19   | M  | Yes  | NA            | Yes                  | 0.03/0.2                      | hyperopia     | NA                   | nystagmus                                                            |
| 24 | 2015, Wang et al.          | SRF600             | HTZ | c.713A>G          | p.Tyr238Cys    | c.721C>T              | p.Pro241Ser      | Cinese                     | 1    | F  | Yes  | NA            | Yes (dark retina)    | LP/LP                         | NA            | NA                   | oculo-digital sign                                                   |
| 25 | 2015, Coppieters et al.    | F1-IV:1            |     |                   |                |                       |                  |                            | NA   | F  | Yes  | NA            | NA                   | NA                            | NA            | NA                   |                                                                      |
| 25 | 2015, Coppieters et al.    | F1-IV:2            | HMZ | c.070A>T          |                | c.070A>T              |                  | Niger                      | NA   | F  | Yes  | NA            | NA                   | NA                            | NA            | NA                   |                                                                      |
| 25 | 2015, Coppieters et al.    | F1-IV:4            |     |                   |                |                       |                  |                            | NA   | F  | Yes  | NA            | NA                   | NA                            | NA            | NA                   |                                                                      |
| 25 | 2015, Coppieters et al.    | F2-IV:2            |     |                   |                |                       |                  |                            | NA   | M  | Yes  | NA            | Yes                  | NA                            | NA            | NA                   |                                                                      |
| 25 | 2015, Coppieters et al.    | F2-IV:3            | HMZ | c.069C>T          |                | c.070A>T              |                  | Morocco                    | NA   | F  | Yes  | NA            | Yes                  | NA                            | NA            | NA                   |                                                                      |
| 25 | 2015, Coppieters et al.    | F3-II:1            | HTZ | c.709C>T          | p.Arg237Cys    | partial gene deletion |                  | Japanese                   | 3m   | M  | Yes  | None          | None                 | 0.03                          | +1.31         | non-recordable       | night blindness                                                      |
| 25 | 2015, Coppieters et al.    | F4-II:1            | HTZ | c.709C>T          | p.Arg237Cys    | partial gene deletion |                  | Japanese                   | 3m   | M  | Yes  | None          | None                 | LP                            | +7.32         | non-recordable       | night blindness                                                      |
| 25 | 2015, Coppieters et al.    | F5                 | HTZ | c.364del          | p.Arg122fs     | c.769G>A              | p.Glu257Lys      | NA                         | NA   | NA | NA   | NA            | NA                   | NA                            | NA            | NA                   |                                                                      |
| 25 | 2015, Coppieters et al.    | F6                 | HTZ | c.542A>G          | p.Tyr181Cys    | c.769G>A              | p.Glu257Lys      | NA                         | NA   | NA | NA   | NA            | NA                   | NA                            | NA            | NA                   |                                                                      |
| 25 | 2015, Coppieters et al.    | F7                 | HTZ | c.679C>T          | p.Arg227Trp    | c.769G>A              | p.Glu257Lys      | NA                         | NA   | NA | NA   | NA            | NA                   | NA                            | NA            | NA                   |                                                                      |
| 25 | 2015, Coppieters et al.    | F8                 | HTZ | c.562C>T          | p.Arg188Trp    | ? (not detected)      |                  | NA                         | NA   | NA | NA   | NA            | NA                   | NA                            | NA            | NA                   |                                                                      |
| 25 | 2015, Coppieters et al.    | F9                 | HTZ | c.53A>G           | p.Asn18Ser     | ? (not detected)      |                  | NA                         | NA   | NA | NA   | NA            | NA                   | NA                            | NA            | NA                   |                                                                      |
| 26 | 2015, Deng et al.          | II:2               |     |                   |                |                       |                  |                            | 24   | M  | Yes  | NA            | NA                   | LP/NLP                        | NA            | non-recordable       |                                                                      |
| 26 | 2015, Deng et al.          | II:5               | HMZ | c.721C>T          | p.Pro241Ser    | c.721C>T              | p.Pro241Ser      | Chinese                    | 10   | M  |      | not-performed |                      | NLP                           | NA            | not-performed        |                                                                      |
| 27 | 2015, Hedergott et al.     | II.1               | HMZ | c.25G>A           | p.Val9Met      | c.25G>A               | p.Val9Met        | Pakistani                  | 5m   | F  | Yes  | None          | Yes                  | NLP/LP                        | +8/+10        | non-recordable       | nystagmus, non-recordable VEP, systemically normal, cataract         |
| 27 | 2015, Hedergott et al.     | II.3               |     |                   |                |                       |                  |                            | 4w   | F  | Yes  | Yes           | Yes                  | NLP/NLP                       | +4/+4         | non-recordable       | nystagmus, non-recordable VEP                                        |
| 28 | 2016, Bravo-Gil et al.     | RP157-II:3         | HTZ | c.197G>A          | p.Arg66Gln     | c.769G>A              | p.Glu257Lys      | Spanish                    | 6m   | M  | Yes  | Yes           | Yes                  | NA                            | NA            | NA                   | malformation syndrome                                                |
| 29 | 2016, Xu et al.            | LH01-II:1          | HTZ | c.196C>T          | p.Arg66Trp     | c.634G>A              | p.Val212Met      | Chinese                    | NA   | NA | NA   | NA            | NA                   | NA                            | NA            | NA                   | (no clinical data was presented)                                     |
| 29 | 2016, Xu et al.            | LH01-II:2          |     |                   |                |                       |                  |                            | NA   | NA | NA   | NA            | NA                   | NA                            | NA            | NA                   | (no clinical data was presented)                                     |
| 29 | 2016, Xu et al.            | QT1118-II:1        | HTZ | c.619C>T          | p.Arg207Trp    | c.721C>T              | p.Pro241Ser      | Chinese                    | NA   | NA | NA   | NA            | NA                   | NA                            | NA            | NA                   | (no clinical data was presented)                                     |
| 29 | 2016, Xu et al.            | QT1118-II:3        |     |                   |                |                       |                  |                            | NA   | NA | NA   | NA            | NA                   | NA                            | NA            | NA                   | (no clinical data was presented)                                     |
| 29 | 2016, Xu et al.            | LH05-II:1          | HMZ | c.737A>T          |                | c.737A>T              |                  | Chinese                    | NA   | NA | NA   | NA            | NA                   | NA                            | NA            | NA                   | (no clinical data was presented)                                     |
| 16 | 2016, Wang et al.          | 18a                | HMZ | c.695G>A          | p.Arg232Lys    | c.695G>A              | p.Arg232Lys      | Han Chinese                | 5    | F  | Yes  | Yes           | Yes                  | CF                            | +2.5          | NA                   | night blindness                                                      |
| 16 | 2016, Wang et al.          | 19                 | HTZ | c.43G>A           | p.Gly15Ser     | c.634G>A              | p.Val212Met      | Han Chinese                | 5    | F  | Yes  | Yes           | Yes                  | 0.05                          | +2            | NA                   | night blindness, exdative change                                     |
| 16 | 2016, Wang et al.          | 20a                | HMZ | c.721C>T          | p.Pro241Ser    | c.721C>T              | p.Pro241Ser      | Han Chinese                | 10m  | M  | Yes  | Yes           | Yes                  | LP/light following            | +5            | NA                   | night blindness, oculo-digital sign                                  |
| 16 | 2016, Wang et al.          | 21                 | HTZ | c.C619T           | p.Arg207Trp    | c.721C>T              | p.Pro241Ser      | Han Chinese                | 1    | M  | Yes  | Yes           | Yes                  | no following and fixation     | NA            | NA                   | oculo-digital sign                                                   |
| 16 | 2016, Wang et al.          | 22                 | HTZ | c.500A>G          | p.Asn167Ser    | c.668C>T              | p.Ser223Phe      | Han Chinese                | 4    | M  | Yes  | Yes           | Yes                  | HM                            | NA            | NA                   | night blindness                                                      |
| 30 | 2017, Jinda et al.         | LCATH3             | HTZ | c.196C>T          | p.Arg66Trp     | c.634G>A              | p.Val212Met      | Thai                       | 13m  | M  | Yes  | Yes           | Yes                  | wondering eye                 | +4.5/-0.3     | non-recordable       |                                                                      |
| 31 | 2017, Han et al.           | P4                 | HTZ | c.196C>T          | p.Arg66Trp     | c.709C>T              | p.Arg237Cys      | Korean                     | 13m  | M  | Yes  | NA            | Yes                  | severe visual impairment      | +5.5/+5.5     | non-recordable       |                                                                      |
| 31 | 2017, Han et al.           | P5                 | HTZ | c.196C>T          | p.Arg66Trp     | c.709C>T              | p.Arg237Cys      | Korean                     | 7m   | F  | Yes  | NA            | Yes                  | severe visual impairment      | +4/+5         | non-recordable       |                                                                      |
| 31 | 2017, Han et al.           | P6                 | HTZ | c.709C>T          | p.Arg237Cys    | ? (not detected)      |                  | Korean                     | 12m  | M  | Yes  | NA            | Yes (marbled fundus) | severe visual impairment      | +4/+3.5       | non-recordable       |                                                                      |
| 17 | 2017, Tompson et al.       | -                  | HTZ | c.364del          |                | c.769G>A              | p.Glu257Lys      | Australian                 | NA   | NA | NA   | NA            | NA                   | LP-NLP                        | NA            | NA                   | photophobia                                                          |
| 17 | 2017, Tompson et al.       | -                  | HTZ | c.364del          |                | c.769G>A              | p.Glu257Lys      | Australian                 | NA   | NA | NA   | NA            | NA                   | LP-NLP                        | NA            | NA                   | photophobia                                                          |
| 17 | 2017, Tompson et al.       | -                  | HTZ | c.507G>A          | p.Trp169*      | c.769G>A              | p.Glu257Lys      | Australian                 | NA   | NA | NA   | NA            | NA                   | LP-NLP                        | NA            | NA                   | photophobia                                                          |
| 32 | 2017, Di Iorio et al.      | 27                 | HTZ | c.53A>G           | p.Asn18Ser     | c.542A>G              | p.Tyr181Cys      | Italy                      | 5    | NA | NA   | NA            | Yes                  | NA                            | NA            | NA                   | onset: 9m                                                            |
| 33 | 2017, Porto et al.         | 20-FBP_57          | HTZ | c.37G>A           | p.Ala13Thr     | c.293T>G              | p.Val98Gly       | Brazilian                  | NA   | NA | NA   | NA            | NA                   | NA                            | NA            | NA                   | (no clinical data was presented)                                     |
| 34 | 2018, Khan, et al.         | II-1               | HMZ | c.500A>G          | p.Asn167Ser    | c.500A>G              | p.Asn167Ser      | Arab                       | 13   | F  | Yes  | None          | None                 | 4/200                         | +6/+6         | cone-rod dysfunction | CRD rather than LCA, but fundus findings were LCA9, CCDC66 mutations |
| 34 | 2018, Khan, et al.         | II-3               |     |                   |                |                       |                  |                            | 10   | M  | Yes  | None          | None                 | 2/200                         | +4.25/+5.25   | NA                   | were also found but probably not pathogenic                          |
| 35 | 2018, Nash et al.          | Case 1             | HMZ | c.271G>A          | p.Glu91Lys     | c.271G>A              | p.Glu91Lys       | Indian                     | 26   | F  | Yes  | None          | None                 | 6/45, 1/120                   | -1.7/-2       | cone dysfunction     | unlike II-1, no apparent difference in day/night vision              |
| 35 | 2018, Nash et al.          | Case 2             | HTZ | c.53A>G           | p.Asn18Ser     | c.769G>A              | p.Glu257Lys      | Caucasian                  | 7    | F  | Yes  | None          | None                 | 6/90 > 6/120                  | +1/+2         | cone-rod dysfunction | large macular degeneration beyond the vascular arcade                |
| 18 | 2018, Hosono et al.        | EYE42              | HTZ | c.1A>G            |                | c.709C>T              | p.Arg237Cys      | Japanese                   | 16   | M  | Yes  | None          | Yes                  | NLP                           | NA            | non-recordable       | nystagmus from birth                                                 |
| 18 | 2018, Hosono et al.        | EYE159             | HTZ | c.196C>T          | p.Arg66Trp     | c.709C>T              | p.Arg237Cys      | Japanese                   | NA   | NA | NA   | NA            | NA                   | NA                            | NA            | non-recordable       |                                                                      |
| 18 | 2018, Hosono et al.        | S132               | HTZ | c.196C>T          | p.Arg66Trp     | c.709C>T              | p.Arg237Cys      | Japanese                   | 14   | F  | Yes  | Yes           | Yes                  | LP                            | NA            | non-recordable       | nystagmus from birth                                                 |
| 36 | 2018, Han et al.           | -                  |     | NA                |                | NA                    |                  | NA                         | 60   | M  | Yes  | Yes           | Yes                  | NA                            | NA            | NA                   |                                                                      |
| 37 | 2018, Weissschuh, et al.   | 10                 | HTZ | c.12dup           | p.Glu5Argfs*4  | c.769G>A              | p.Glu257Lys      | German                     | 48   | F  | NA   | NA            | NA                   | LP                            | NA            | NA                   | cataract, nystagmus                                                  |
| 38 | 2020, Xu et al.            | -                  | HTZ | c.196C>T          | p.Arg66Trp     | c.721C>T              | p.Pro241Ser      | Chinese                    | NA   | NA | NA   | NA            | NA                   | NA                            | NA            | NA                   |                                                                      |
| 19 | 2020, Surl et al.          | 22                 | HTZ | c.275G>A          | p.Trp92*       | c.709C>T              | p.Arg237Cys      | Korean                     | 1.4  | F  | Yes  | NA            | Yes                  | no maintained fixation        | +5/+5.5       | non-recordable       | multiple "bear-foot like" colobomatous MD, systemically normal       |
| 19 | 2020, Surl et al.          | 23                 | HTZ | c.196C>T          | p.Arg66Trp     | c.709C>T              | p.Arg237Cys      | Korean                     | 0.5  | M  | Yes  | NA            | None                 | no maintained fixation        | +4.75/+7.25   | non-recordable       | systemically normal                                                  |
| 19 | 2020, Surl et al.          | 24                 | HTZ | c.196C>T          | p.Arg66Trp     | c.709C>T              | p.Arg237Cys      | Korean                     | 4.2  | M  | Yes  | NA            | None                 | no maintained fixation        | +4/+4.5       | non-recordable       | systemically normal                                                  |
| 19 | 2020, Surl et al.          | 25                 | HTZ | c.196C>T          | p.Arg66Trp     | c.709C>T              | p.Arg237Cys      | Korean                     | 6.3  | M  | Yes  | NA            | Yes                  | LP/LP                         | +4.5/+5.5     | non-recordable       | systemically normal                                                  |
| 19 | 2020, Surl et al.          | 26                 | HTZ | c.196C>T          | p.Arg66Trp     | c.709C>T              | p.Arg237Cys      | Korean                     | 1.2  | F  | Yes  | NA            | None                 | no maintained fixation        | +3.5/+3.5     | non-recordable       | systemically normal                                                  |
| 19 | 2020, Surl et al.          | 27                 | HTZ | c.196C>T          | p.Arg66Trp     | c.709C>T              | p.Arg237Cys      | Korean                     | 1.4  | M  | Yes  | NA            | None                 | LP/LP                         | +4.5/+4.5     | non-recordable       | systemically normal                                                  |
| 19 | 2020, Surl et al.          | 28                 | HTZ | c.196C>T          | p.Arg66Trp     | c.709C>T              | p.Arg237Cys      | Korean                     | 0.5  | F  | Yes  | NA            | Yes                  | LP/LP                         | +4/+5         | non-recordable       | systemically normal                                                  |
| 19 | 2020, Surl et al.          | 29                 | HTZ | Exon 4-5 deletion |                | c.709C>T              | p.Arg237Cys      | Korean                     | 0.8  | F  | Yes  | NA            | None                 | no maintained fixation        | +6.5/+6.5     | non-recordable       | systemically normal                                                  |
| 19 | 2020, Surl et al.          | 30                 | HTZ | Exon 2 deletion   |                | c.709C>T              | p.Arg237Cys      | Korean                     | 1.3  | F  | Yes  | NA            | None                 | no maintained fixation        | +5/+5         | non-recordable       | systemically normal                                                  |
| 39 | 2020, Ruberto et al.       | 1                  | HTZ | c.619C>T          | p.Arg207Tyr?   | c.769G>A              | p.Glu257Lys      | Italy                      | 1y1m | F  | Yes  | Yes           | Yes                  | 0.7/10                        | NA            | non-recordable       | peripheral coloboma, pendular nystagmus                              |
| 39 | 2020, Ruberto et al.       | 16                 | HMZ | c.769G>A          | p.Glu257Lys    | c.769G>A              | p                |                            |      |    |      |               |                      |                               |               |                      |                                                                      |

|    |                              |       |     |                      |             |                |                   |           |             |    |              |     |     |     |                            |    |                                            |
|----|------------------------------|-------|-----|----------------------|-------------|----------------|-------------------|-----------|-------------|----|--------------|-----|-----|-----|----------------------------|----|--------------------------------------------|
| 43 | 2020, Sallum, et al.         | 61.1  | HTZ | c.716T>C             | p.Leu239Ser | c.769G>A       | p.Glu257Lys       | Brazilian | since birth | NA |              | Yes | Yes | LP  | NA                         | NA |                                            |
| 43 | 2020, Sallum, et al.         | 62.1  | HTZ | Exon 204 duplication |             | c.769G>A       | p.Glu257Lys       | Brazilian | 3m          | NA |              | Yes | Yes | HM  | NA                         | NA |                                            |
| 43 | 2020, Sallum, et al.         | 63.1  | HTZ | c.37G>A              | p.Ala13Thr  | c.293T>G       | p.Val98Gly        | Brazilian | since birth | NA |              | Yes | Yes | LP  | NA                         | NA |                                            |
| 43 | 2020, Sallum, et al.         | 64.1  | HTZ | c.-57+21C>T          |             | c.759delGinsTA | p.Leu253PhefsTer5 | Brazilian | 4m          | NA | some of them | Yes | Yes | NLP | NA                         | NA | Coats disease in some of them              |
| 43 | 2020, Sallum, et al.         | 65.1  | HTZ | c.507G>A             | p.Trp169Ter | c.769G>A       | p.Glu257Lys       | Brazilian | 3m          | NA |              | Yes | Yes | NLP | NA                         | NA |                                            |
| 43 | 2020, Sallum, et al.         | 66.1  | HTZ | c.293T>G             | p.Val98Gly  | c.769G>A       | p.Glu257Lys       | Brazilian | since birth | NA |              | Yes | Yes | NLP | NA                         | NA |                                            |
| 43 | 2020, Sallum, et al.         | 67.1  | HTZ | c.507G>A             | p.Trp169Ter | c.769G>A       | p.Glu257Lys       | Brazilian | since birth | NA |              | Yes | Yes | LP  | NA                         | NA |                                            |
| 44 | 2020, Skorczyk-Werner et al. | 9-29  | HTZ | c.59T>A              | p.Ile20Asn  | c.769G>A       | p.Glu257Lys       | Polish    | 10          | F  | NA           | Yes | Yes | LP  | hyperopia with astigmatism | NA | photophobia, nystagmus, oculo-digital sign |
| 44 | 2020, Skorczyk-Werner et al. | 19-47 | HTZ | c.65A>G              | p.Asn22Ser  | c.769G>A       | p.Glu257Lys       | Polish    | 15          | M  | Yes          | Yes | NA  | HM  | hyperopia with astigmatism | NA | mild nystagmus, oculo-digital sign         |
| 45 | 2021, Han et al.             | -     | HTZ | c.196C>T             | p.Arg66Trp  | c.709C>T       | p.Arg237Cys       | Korean    | 6m          | F  | Yes          | Yes | Yes | NA  | NA                         | NA | Coats' disease                             |

HMZ: homozygous, HTZ: heterozygous, NA: not available, y: years, m: months, w: weeks, NLP: no light perception, LP: light perception, CF: counting fingers, CRD: cone-rod dystrophy, LCA: Leber congenital amaurosis, RP: retinitis pigmentosa, OCT: Optical coherence tomography, y.o.: years old, MD: macular degeneration, IOL: intraocular lens, VEP: visual evoked potential, SHILCA: spondylo-epiphyseal dysplasia, sensorineural hearing loss, intellectual disability and Leber congenital amaurosis

The variants are transcribed exactly as presented in the original article.
