# Supplementary material
Source: publisher figshare collection journal article supplement (https://tandf.figshare.com/articles/dataset/_/18393669)
Supplement: Supplementary file 3 [file 2]

# Supplementary Table 3.

## The clinical findings and variants in patients with *NMNAT1*-associated retinopathy

| Refere<br>ence # | Published year, Authors    | Patient #          | Age         | Gender | Macular<br>degeneration | Optic<br>disk<br>atrophy                         | Retinal<br>degeneration | Visual acuity        | Refractive<br>errors | Electro-<br>retinogram | Others                                                                              | Variant 1   | Variant 1        | Variant 2          | Variant 2             | Ethnicity                    |
|------------------|----------------------------|--------------------|-------------|--------|-------------------------|--------------------------------------------------|-------------------------|----------------------|----------------------|------------------------|-------------------------------------------------------------------------------------|-------------|------------------|--------------------|-----------------------|------------------------------|
| 9                | 2012, Chiang et al.        | 2                  | 6m          | M      | Yes                     | NA                                               | Yes                     | NLP                  | NA                   | NA                     | nystagmus                                                                           | c.507G>A    | p.Trp169*        | c.769G>A           | p.Glu257Lys           | Brazil Caucasian (Poland,    |
| 10               | 2012, Perrault et al.      | P7.1               | 59          | M      |                         | invisible due to cataract                        |                         | NLP                  | hyperopia            | NA                     | cataract                                                                            | c.542A>G    | p.Tyr181Cys      | c.769G>A           | p.Glu257Lys           | France                       |
| 10               | 2012, Perrault et al.      | P7.2               | 60          | M      |                         | invisible due to cataract                        |                         | NLP                  | hyperopia            | NA                     | cataract                                                                            | c.542A>G    | p.Tyr181Cys      | c.769G>A           | p.Glu257Lys           | France                       |
| 10               | 2012, Perrault et al.      | P15                | 6           | M      | Yes                     | NA                                               | NA                      | NLP                  | +4/+5                | NA                     | sun photophobia                                                                     | c.643G>T    | p.Glu215*        | c.769G>A           | p.Glu257Lys           | France                       |
| 10               | 2012, Perrault et al.      | P19                | 3           | M      | No                      | Yes                                              | Yes                     | NLP                  | NA                   | NA                     |                                                                                     | c.205A>G    | p.Met69Val       | c.650T>A           | p.Ile217Asn           | South Africa/France          |
| 10               | 2012, Perrault et al.      | P22.1              | 18          | M      |                         | invisible due to retinal detachment and cataract |                         | NLP                  | NA                   | NA                     | retinal detachment and cataract                                                     | c.319G>T    | p.Glu107*        | c.709C>T           | p.Arg237Cys           | France                       |
| 10               | 2012, Perrault et al.      | P22.2              | 13          | F      |                         | invisible due to ocular phytis and cataract      |                         | NLP                  | NA                   | NA                     | retinal detachment and cataract                                                     | c.319G>T    | p.Glu107*        | c.709C>T           | p.Arg237Cys           | France                       |
| 10               | 2012, Perrault et al.      | P26.2              | 24          | NA     | Yes                     | Yes                                              | NA                      | NLP                  | NA                   | NA                     |                                                                                     | c.769G>A    | p.Glu257Lys      | ?                  | ?                     | Portugal/La Leunion (France) |
| 10               | 2012, Perrault et al.      | P28.1              | 6           | NA     | Yes                     | NA                                               | NA                      | NLP                  | NA                   | NA                     |                                                                                     | c.769G>A    | p.Glu257Lys      | ?                  | ?                     | France                       |
| 10               | 2012, Perrault et al.      | P29                | NA          | NA     | NA                      | NA                                               | NA                      | NLP                  | NA                   | NA                     | photophobia                                                                         | c.769G>A    | p.Glu257Lys      | ?                  | ?                     | La Leunion (France)          |
| 11               | 2012, Koenekoop et al.     | MOGL624            | 10          | M      | Yes                     | Yes                                              | Yes                     | NLP                  | hyperopia            | NA                     | nystagmus                                                                           | c.769G>A    | p.Glu257Lys      | c.769G>A           | p.Glu257Lys           | Saudi Arabian                |
| 12               | 2012, Falk et al.          | CHOP/MEEI-053-II-1 | 20          | F      | Yes                     | Yes                                              | Yes                     | NLP                  | NA                   | non-recordable         | 33-week's gestational age, developmental delay                                      | c.205A>G    | p.Met69Val       | c.769G>A           | p.Glu257Lys           | African American             |
| 12               | 2012, Falk et al.          | UCL-1-II-1         | 4           | F      | Yes                     | Yes                                              | Yes                     | NLP                  | +11                  | non-recordable         |                                                                                     | c.205A>G    | p.Met69Val       | c.769G>A           | p.Glu257Lys           | Caucasian descent            |
| 12               | 2012, Falk et al.          | UCL-7-II-1         | 36m         | M      | Yes                     | Yes                                              | Yes                     | NLP                  | NA                   | non-recordable         |                                                                                     | c.466G>C    | p.Gly156Arg      | c.769G>A           | p.Glu257Lys           | British (European descent)   |
| 23               | 2014, Siemiatkowska et al. | 4                  | 64          | M      | No                      | No                                               | Yes                     | NLP                  | not performed        | not performed          | keratoconus                                                                         | c.595G>T    | p.Glu199*        | c.769G>A           | p.Glu257Lys           | Danish                       |
| 26               | 2015, Deng et al.          | II:5               | 10          | M      |                         | not-performed                                    |                         | NLP                  | NA                   | not-performed          |                                                                                     | c.721C>T    | p.Pro241Ser      | c.721C>T           | p.Pro241Ser           | Chinese                      |
| 28               | 2016, Bravo-Gil et al.     | RP157-II:3         | 6m          | M      | Yes                     | Yes                                              | Yes                     | NLP                  | NA                   | NA                     | malformation syndrome                                                               | c.197G>A    | p.Arg66Gln       | c.769G>A           | p.Glu257Lys           | Spanish                      |
| 18               | 2018, Hosono et al.        | EYE42              | 16          | M      | Yes                     | No                                               | Yes                     | NLP                  | NA                   | non-recordable         | nystagmus from birth                                                                | c.1A>G      |                  | C.709C>T           | p.Arg237Cys           | Japanese                     |
| 43               | 2020, Sallum, et al.       | 64.1               | 4m          | NA     | Yes/No                  | Yes                                              | Yes                     | NLP                  | NA                   | NA                     |                                                                                     | c.-57+21C>T |                  | c.759delGins<br>TA | p.Leu253Phef<br>sTer5 | Brazilian                    |
| 43               | 2020, Sallum, et al.       | 65.1               | 3m          | NA     | Yes/No                  | Yes                                              | Yes                     | NLP                  | NA                   | NA                     |                                                                                     | c.507G>A    | p.Trp169Ter      | c.769G>A           | p.Glu257Lys           | Brazilian                    |
| 43               | 2020, Sallum, et al.       | 66.1               | since birth | NA     | Yes/No                  | Yes                                              | Yes                     | NLP                  | NA                   | NA                     |                                                                                     | c.293T>G    | p.Val98Gly       | c.769G>A           | p.Glu257Lys           | Brazilian                    |
| 27               | 2015, Hedergott et al.     | II.3               | 4w          | F      | Yes                     | Yes                                              | Yes                     | NLP/NLP              | +4/+4                | non-recordable         | nystagmus, non-recordable VEP                                                       | c.25G>A     | p.Val9Met        | c.25G>A            | p.Val9Met             | Pakistani                    |
| 12               | 2012, Falk et al.          | CHOP/MEEI-047-IV-6 | NA          | M      | NA                      | NA                                               | NA                      | congenital blindness | NA                   | NA                     | LCA without developmetal delay                                                      | c.25G>A     | p.Val9Met        | c.25G>A            | p.Val9Met             | Pakistani                    |
| 12               | 2012, Falk et al.          | CHOP/MEEI-047-IV-7 | NA          | F      | NA                      | NA                                               | NA                      | congenital blindness | NA                   | NA                     | hearing loss and developmental delay (GJB2 mutations combined)                      | c.25G>A     | p.Val9Met        | c.25G>A            | p.Val9Met             | Pakistani                    |
| 12               | 2012, Falk et al.          | CHOP/MEEI-047-IV-8 | NA          | M      | NA                      | NA                                               | NA                      | congenital blindness | NA                   | NA                     | hearing loss and developmental delay (GJB2 mutations combined)                      | c.25G>A     | p.Val9Met        | c.25G>A            | p.Val9Met             | Pakistani                    |
| 12               | 2012, Falk et al.          | CHOP/MEEI-047-IV-3 | 4m          | M      | Yes(3y)                 | mild                                             | Yes                     | LP > NLP             | significant myopia   | non-recordable         | enophthalmos, neural development delay, non-verbal at age 4, autism, normal hearing | c.25G>A     | p.Val9Met        | c.25G>A            | p.Val9Met             | Pakistani                    |
| 26               | 2015, Deng et al.          | II:2               | 24          | M      | Yes                     | NA                                               | NA                      | LP/NLP               | NA                   | non-recordable         |                                                                                     | c.721C>T    | p.Pro241Ser      | c.721C>T           | p.Pro241Ser           | Chinese                      |
| 11               | 2012, Koenekoop et al.     | LCA9 IV:8          | 2-30        | F      | Yes                     | Yes                                              | Yes                     | LP-NLP               | NA                   | NA                     |                                                                                     | c.838T>C    | p.*280Gln        | c.838T>C           | p.*280Gln             | Pakistani                    |
| 11               | 2012, Koenekoop et al.     | LCA9 IV:9          | 2-30        | F      | Yes                     | NA                                               | Yes                     | LP-NLP               | NA                   | NA                     |                                                                                     | c.838T>C    | p.*280Gln        | c.838T>C           | p.*280Gln             | Pakistani                    |
| 11               | 2012, Koenekoop et al.     | LCA9 IV:11         | 2-30        | F      | Yes                     | NA                                               | Yes                     | LP-NLP               | NA                   | NA                     |                                                                                     | c.838T>C    | p.*280Gln        | c.838T>C           | p.*280Gln             | Pakistani                    |
| 11               | 2012, Koenekoop et al.     | LCA9 IV:12         | 2-30        | F      | Yes                     | NA                                               | Yes                     | LP-NLP               | NA                   | NA                     | nystagmus, night blindness, cataract (posterior subcapsular), one has keratoconus   | c.838T>C    | p.*280Gln        | c.838T>C           | p.*280Gln             | Pakistani                    |
| 11               | 2012, Koenekoop et al.     | LCA9 IV:13         | 2-30        | M      | Yes                     | NA                                               | Yes                     | LP-NLP               | NA                   | NA                     |                                                                                     | c.838T>C    | p.*280Gln        | c.838T>C           | p.*280Gln             | Pakistani                    |
| 11               | 2012, Koenekoop et al.     | LCA9 IV:16         | 2-30        | F      | Yes                     | NA                                               | Yes                     | LP-NLP               | NA                   | NA                     |                                                                                     | c.838T>C    | p.*280Gln        | c.838T>C           | p.*280Gln             | Pakistani                    |
| 11               | 2012, Koenekoop et al.     | LCA9 IV:17         | 2-30        | F      | Yes                     | NA                                               | Yes                     | LP-NLP               | NA                   | NA                     |                                                                                     | c.838T>C    | p.*280Gln        | c.838T>C           | p.*280Gln             | Pakistani                    |
| 11               | 2012, Koenekoop et al.     | LCA9 IV:18         | 2-30        | F      | Yes                     | NA                                               | Yes                     | LP-NLP               | NA                   | NA                     |                                                                                     | c.838T>C    | p.*280Gln        | c.838T>C           | p.*280Gln             | Pakistani                    |
| 17               | 2017, Tompson et al.       | -                  | NA          | NA     | NA                      | NA                                               | NA                      | LP-NLP               | NA                   | NA                     | photophobia                                                                         | c.364del    |                  | c.769G>A           | p.Glu257Lys           | Australian                   |
| 17               | 2017, Tompson et al.       | -                  | NA          | NA     | NA                      | NA                                               | NA                      | LP-NLP               | NA                   | NA                     | photophobia                                                                         | c.364del    |                  | c.769G>A           | p.Glu257Lys           | Australian                   |
| 17               | 2017, Tompson et al.       | -                  | NA          | NA     | NA                      | NA                                               | NA                      | LP-NLP               | NA                   | NA                     | photophobia                                                                         | c.507G>A    | p.Trp169*        | c.769G>A           | p.Glu257Lys           | Australian                   |
| 10               | 2012, Perrault et al.      | P5                 | 12          | F      | Yes                     | NA                                               | NA                      | NLP/LP               | +9.5/+7.75           | NA                     | night blindness                                                                     | c.43911G>C  | Splice           | c.769G>A           | p.Glu257Lys           | France                       |
| 27               | 2015, Hedergott et al.     | II.1               | 5m          | F      | Yes                     | No                                               | Yes                     | NLP/LP               | +8/+10               | non-recordable         | nystagmus, non-recordable VEP, systemically normal, cataract                        | c.25G>A     | p.Val9Met        | c.25G>A            | p.Val9Met             | Pakistani                    |
| 9                | 2012, Chiang et al.        | 3                  | 4m          | F      | Yes                     | NA                                               | Yes                     | LP-NLP               | NA                   | NA                     | oculo-digital sign                                                                  | c.507G>A    | p.Trp169*        | c.769G>A           | p.Glu257Lys           | Brazil                       |
| 11               | 2012, Koenekoop et al.     | MOGL208            | 56          | F      | Yes                     | Yes                                              | Yes                     | NLP/CF               | hyperopia            | NA                     | nystagmus                                                                           | c.769G>A    | p.Glu257Lys      | c.817A>G           | p.Asn273Asp           | French Candadian             |
| 9                | 2012, Chiang et al.        | 7                  | 10          | F      | Yes                     |                                                  |                         | LP                   | NA                   | profoundly abnormal    | MD and relatively normal peripheral retina, later MD enlarged                       | c.104T>C    | p.Met35Thr       | c.769G>A           | p.Glu257Lys           | USA                          |
| 9                | 2012, Chiang et al.        | 11                 | 8w?         | F      | Yes                     | NA                                               | NA                      | LP                   | NA                   | severe dysfunction     | nystagmus and roving eye                                                            | c.507G>A    | p.Trp169*        | c.769G>A           | p.Glu257Lys           | Australian, English          |
| 10               | 2012, Perrault et al.      | P1                 | 19          | M      | Yes                     | Yes                                              | NA                      | LP                   | +9                   | NA                     |                                                                                     | c.1A>G      | p.Met1?          | c.769G>A           | p.Glu257Lys           | Italy                        |
| 10               | 2012, Perrault et al.      | P3                 | 3           | M      | Yes                     | NA                                               | NA                      | LP                   | NA                   | NA                     | photophobia                                                                         | c.362delA   | p.Glu121Glufs*20 | c.769G>A           | p.Glu257Lys           | France                       |
| 10               | 2012, Perrault et al.      | P4                 | 9           | M      | Yes                     | Yes                                              | Yes                     | LP                   | +7/+8                | NA                     | photophobia, neonatal and fast progressing macular atrophy                          | c.439G>C    | p.Ala147Pro      | c.769G>A           | p.Glu257Lys           | France                       |
| 10               | 2012, Perrault et al.      | P6                 | 19          | F      | Yes                     | NA                                               | NA                      | LP                   | +4                   | NA                     | photophobia                                                                         | c.518A>G    | p.Asp173Gly      | c.769G>A           | p.Glu257Lys           | France                       |
| 10               | 2012, Perrault et al.      | P16                | 24          | F      | Yes                     | Yes                                              | Yes                     | LP                   | +2.25/+6.75          | NA                     | photophobia                                                                         | c.752A>C    | p.His251Pro      | c.769G>A           | p.Glu257Lys           | Spain                        |
| 10               | 2012, Perrault et al.      | P18                | 12          | M      | Yes                     | NA                                               | NA                      | LP                   | +6/+7                | NA                     | photophobia                                                                         | c.37G>A     | p.Ala13Thr       | c.468T>C           | p.Leu153Pro           | France                       |
| 10               | 2012, Perrault et al.      | P20                | 1           | F      | Yes                     | Yes                                              | Yes                     | LP                   | +6.75/+7             | NA                     | photophobia                                                                         | c.362delA   | p.Glu121Glufs*20 | c.532G>A           | p.Val178Met           | France                       |
| 10               | 2012, Perrault et al.      | P25                | 8           | NA     | Yes                     | NA                                               | NA                      | LP                   |                      | NA                     |                                                                                     | c.769G>A    | p.Glu257Lys      | ?                  | ?                     | France                       |
| 10               | 2012, Perrault et al.      | P26.1              | 28          | NA     | Yes                     | Yes                                              | NA                      | LP                   | NA                   | NA                     | photophobia                                                                         | c.769G>A    | p.Glu257Lys      | ?                  | ?                     | Portugal/La Leunion (France) |
| 10               | 2012, Perrault et al.      | P27                | 3           | NA     | Yes                     | NA                                               | Yes                     | LP                   | +5                   | NA                     | photophobia                                                                         | c.769G>A    | p.Glu257Lys      | ?                  | ?                     | France                       |
| 12               | 2012, Falk et al.          | LVPEI-79-IV-1      | 1           | NA     | Yes                     | moderate                                         | Yes                     | LP                   | NA                   | NA                     | motor developmental delay and it was improved                                       | c.98A>G     | p.Asp33Gly       | c.98A>G            | p.Asp33Gly            | Indian                       |
| 12               | 2012, Falk et al.          | UCL-2-II-2         | 13m         | F      | Yes                     | NA                                               | Yes                     | LP                   | +3                   | non-recordable         |                                                                                     | c.161C>T    | p.Ala54Val       | c.293T>G           | p.Val98Gly            | Caribbean & Sri Lankan       |
| 12               | 2012, Falk et al.          | UCL-4-II-1         | 13m         | M      | Yes                     | NA                                               | Yes                     | LP                   | +6.5/+6.5            | non-recordable         |                                                                                     | c.723delA   | p.Pro241Profs*45 | c.769G>A           | p.Glu257Lys           | Caribbean & Irish            |

|    |                              |                    |                |    |        |         |                      |                                                                 |                            |                      |                                                                                                                                |                      |             |                       |                  |                                             |
|----|------------------------------|--------------------|----------------|----|--------|---------|----------------------|-----------------------------------------------------------------|----------------------------|----------------------|--------------------------------------------------------------------------------------------------------------------------------|----------------------|-------------|-----------------------|------------------|---------------------------------------------|
| 12 | 2012, Falk et al.            | UCL-5-II-2         | 18m            | F  | Yes    | NA      | Yes                  | LP                                                              | +6/+6                      |                      | enophthalmos, older sibling was developmentally delay                                                                          | c.59T>A              | p.Ile20Asn  | c.769G>A              | p.Glu257Lys      | Polish                                      |
| 23 | 2014, Siemiatkowska et al.   | 1                  | 23             | M  | Yes    | No      | Yes                  | LP                                                              | +7/+7.5                    | non-recordable       | cataract (posterior subcapsular)                                                                                               | c.53A>G              | p.Asn18Ser  | c.472G>C              | p.Asp158His      | German/French                               |
| 23 | 2014, Siemiatkowska et al.   | 2                  | 25             | F  | Yes    | Yes     | Yes                  | LP                                                              | not performed              | non-recordable       | none                                                                                                                           | c.253T>C             | p.Trp85Arg  | c.769G>A              | p.Glu257Lys      | German                                      |
| 23 | 2014, Siemiatkowska et al.   | 3.2                | 2              | F  | Yes    | NA      | Yes                  | LP                                                              | +6.5                       | not performed        | none                                                                                                                           | c.617A>G             | p.His206Ala | c.769G>A              | p.Glu257Lys      | Dutch                                       |
| 23 | 2014, Siemiatkowska et al.   | 5                  | 16             | F  | Yes    | NA      | No                   | LP                                                              | -0.25                      | non-recordable       | none                                                                                                                           | c.731T>C             | p.Val244Ala | c.769G>A              | p.Glu257Lys      | German                                      |
| 25 | 2015, Coppieters et al.      | F4-II:1            | 3m             | M  | Yes    | No      | No                   | LP                                                              | +7.32                      | non-recordable       | night blindness                                                                                                                | c.709C>T             | p.Arg237Cys | partial gene deletion |                  | Japanese                                    |
| 18 | 2018, Hosono et al.          | S132               | 14             | F  | Yes    | Yes     | Yes                  | LP                                                              | NA                         | non-recordable       | nystagmus from birth                                                                                                           | c.196C>T             | p.Arg66Trp  | c.709C>T              | p.Arg237Cys      | Japanese                                    |
| 37 | 2018, Weisschuh, et al.      | 10                 | 48             | F  | NA     | NA      | NA                   | LP                                                              | NA                         | NA                   | cataract, nystagmus                                                                                                            | c.12dup              | p.E5Rfs*4   | c.769G>A              | p.Glu257Lys      | German                                      |
| 40 | 2020, Bedoni et al.          | Family 1-P1        | 1m             | M  | Yes    | Yes     | Yes                  | LP                                                              | NA                         | non-recordable       | SHILCA                                                                                                                         | 7.1kb duplication    |             | 7.1kb duplication     |                  | Italy                                       |
| 40 | 2020, Bedoni et al.          | Family 1-P2        | 1m             | F  | Yes    | NA      | Yes                  | LP                                                              | +8                         | non-recordable       | SHILCA                                                                                                                         | 7.1kb duplication    |             | 7.1kb duplication     |                  | Italy                                       |
| 43 | 2020, Sallum, et al.         | 61.1               | since birth    | NA | Yes/No | Yes     | Yes                  | LP                                                              | NA                         | NA                   |                                                                                                                                | c.716T>C             | p.Leu239Ser | c.769G>A              | p.Glu257Lys      | Brazilian                                   |
| 43 | 2020, Sallum, et al.         | 63.1               | since birth    | NA | Yes/No | Yes     | Yes                  | LP                                                              | NA                         | NA                   | Coats disease in some of them                                                                                                  | c.37G>A              | p.Ala13Thr  | c.293T>G              | p.Val98Gly       | Brazilian                                   |
| 43 | 2020, Sallum, et al.         | 67.1               | since birth    | NA | Yes/No | Yes     | Yes                  | LP                                                              | NA                         | NA                   |                                                                                                                                | c.507G>A             | p.Trp169Ter | c.769G>A              | p.Glu257Lys      | Brazilian                                   |
| 44 | 2020, Skorczyk-Werner et al. | 9-29               | 10             | F  | NA     | Yes     | Yes                  | LP                                                              | hyperopia with astigmatism | NA                   | photophobia, nystagmus, oculo-digital sign                                                                                     | c.59T>A              | p.Ile20Asn  | c.769G>A              | p.Glu257Lys      | Polish                                      |
| 12 | 2012, Falk et al.            | CHOP/MEEI-007-II-2 | 3              | F  | Yes    | Yes     | Yes                  | LP at age 4                                                     | NA                         | NA                   | significant fixing and following at age 3                                                                                      | c.196C>T             | p.Arg66Trp  | c.709C>T              | p.Arg237Cys      | Asian American                              |
| 9  | 2012, Chiang et al.          | 1                  | several months | M  | Yes    | NA      | Yes                  | LP, lack of vision several hours after birth                    | NA                         | non-recordable       |                                                                                                                                | c.507G>A             | p.Trp169*   | c.769G>A              | p.Glu257Lys      | Cherokee Indian, Asian, Hispanic, Caucasian |
| 24 | 2015, Wang et al.            | SRF120             | 22             | M  | Yes    | NA      | Yes                  | LP/LP                                                           | myopia                     | NA                   | keratoconus, nystagmus                                                                                                         | c.709C>T             | p.Arg237Cys | c.713A>G              | p.Tyr238Cys      | Cinese                                      |
| 24 | 2015, Wang et al.            | SRF600             | 1              | F  | Yes    | NA      | Yes (dark retina)    | LP/LP                                                           | NA                         | NA                   | oculo-digital sign                                                                                                             | c.713A>G             | p.Tyr238Cys | c.721C>T              | p.Pro241Ser      | Cinese                                      |
| 19 | 2020, Surl et al.            | 25                 | 6.3            | M  | Yes    | NA      | Yes                  | LP/LP                                                           | +4.5/+5.5                  | non-recordable       | systemically normal                                                                                                            | c.196C>T             | p.Arg66Trp  | c.709C>T              | p.Arg237Cys      | Korean                                      |
| 19 | 2020, Surl et al.            | 27                 | 1.4            | M  | Yes    | NA      | No                   | LP/LP                                                           | +4.5/+4.5                  | non-recordable       | systemically normal                                                                                                            | c.196C>T             | p.Arg66Trp  | c.709C>T              | p.Arg237Cys      | Korean                                      |
| 19 | 2020, Surl et al.            | 28                 | 0.5            | F  | Yes    | NA      | Yes                  | LP/LP                                                           | +4/+5                      | non-recordable       | systemically normal                                                                                                            | c.196C>T             | p.Arg66Trp  | c.709C>T              | p.Arg237Cys      | Korean                                      |
| 23 | 2014, Siemiatkowska et al.   | 6                  | 72             | M  | Yes    | Yes     | Yes                  | LP/HM                                                           | not performed              | non-recordable       | panretinal degeneration                                                                                                        | c.619C>T             | p.R207W     | c.769G>A              | p.Glu257Lys      | Dutch                                       |
| 16 | 2016, Wang et al.            | 20a                | 10m            | M  | Yes    | Yes     | Yes                  | LP/light following                                              | +5                         | NA                   | night blindness, oculo-digital sign                                                                                            | c.721C>T             | p.Pro241Ser | c.721C>T              | p.Pro241Ser      | Han Chinese                                 |
| 9  | 2012, Chiang et al.          | 9                  | 21             | M  | Yes    | Yes     | Yes                  | color vision lost thereafter, LP at age 22.                     | NA                         | NA                   |                                                                                                                                | c.255G>A             | p.Trp85*    | c.769G>A              | p.Glu257Lys      | Canada                                      |
| 10 | 2012, Perrault et al.        | P2                 | 15             | F  | NA     | NA      | NA                   | HM                                                              | high hyperopia             | NA                   |                                                                                                                                | c.205A>G             | p.Met69Val  | c.769G>A              | p.Glu257Lys      | Spain/France                                |
| 22 | 2014, Jin et al.             | Family-035-II:2    | 6              | F  | Yes    | Yes     | Yes                  | HM                                                              | NA                         | non-recordable       | normal mental/physical health                                                                                                  | c.196C>T             | p.Arg66Trp  | c.272A>G              | p.Glu91Gly       | Chinese                                     |
| 22 | 2014, Jin et al.             | Family-035-II:3    | 8              | M  | Yes    | Yes     | Yes                  | HM                                                              | NA                         | non-recordable       | normal mental/physical health                                                                                                  | c.196C>T             | p.Arg66Trp  | c.272A>G              | p.Glu91Gly       | Chinese                                     |
| 16 | 2016, Wang et al.            | 22                 | 4              | M  | Yes    | Yes     | Yes                  | HM                                                              | NA                         | NA                   | night blindness                                                                                                                | c.500A>G             | p.Asn167Ser | c.668C>T              | p.Ser223Phe      | Han Chinese                                 |
| 43 | 2020, Sallum, et al.         | 62.1               | 3m             | NA | Yes/No | Yes     | Yes                  | HM                                                              | NA                         | NA                   |                                                                                                                                | exon 2-4 duplication |             | c.769G>A              | p.Glu257Lys      | Brazilian                                   |
| 44 | 2020, Skorczyk-Werner et al. | 19-47              | 15             | M  | Yes    | Yes     | NA                   | HM                                                              | hyperopia with astigmatism | NA                   | mild nystagmus, oculo-digital sign                                                                                             | c.65A>G              | p.Asn22Ser  | c.769G>A              | p.Glu257Lys      | Polish                                      |
| 12 | 2012, Falk et al.            | UCL-6-II-1         | 41             | M  | Yes    | NA      | Yes                  | HM/HM                                                           | NA                         | NA                   | IOL OU                                                                                                                         | c.552A>G             | p.Ile184Met | c.769G>A              | p.Glu257Lys      | British (European descent)                  |
| 9  | 2012, Chiang et al.          | 5                  | 1              | M  | Yes    | NA      | Yes                  | no fixation                                                     | NA                         | NA                   | Coats' disease OS at age 4 years                                                                                               | c.293T>G             | p.Val98Gly  | c.769G>A              | p.Glu257Lys      | Brazil                                      |
| 9  | 2012, Chiang et al.          | 8                  | 1              | M  | NA     | NA      | NA                   | no fixation                                                     | NA                         | profoundly abnormal  | roving eye                                                                                                                     | c.104T>C             | p.Met35Thr  | c.769G>A              | p.Glu257Lys      | USA                                         |
| 16 | 2016, Wang et al.            | 21                 | 1              | M  | Yes    | Yes     | Yes                  | no following and fixation                                       | NA                         | NA                   | oculo-digital sign                                                                                                             | c.C619T              | p.Arg207Trp | c.721C>T              | p.Pro241Ser      | Han Chinese                                 |
| 19 | 2020, Surl et al.            | 22                 | 1.4            | F  | Yes    | NA      | Yes                  | no maintained fixation                                          | +5/+5.5                    | non-recordable       | multiple "bear-foot like" colobomatous MD, systemically normal                                                                 | c.275G>A             | p.Trp92*    | c.709C>T              | p.Arg237Cys      | Korean                                      |
| 19 | 2020, Surl et al.            | 23                 | 0.5            | M  | Yes    | NA      | No                   | no maintained fixation                                          | +4.75/+7.25                | non-recordable       | systemically normal                                                                                                            | c.196C>T             | p.Arg66Trp  | c.709C>T              | p.Arg237Cys      | Korean                                      |
| 19 | 2020, Surl et al.            | 24                 | 4.2            | M  | Yes    | NA      | No                   | no maintained fixation                                          | +4/+4.5                    | non-recordable       | systemically normal                                                                                                            | c.196C>T             | p.Arg66Trp  | c.709C>T              | p.Arg237Cys      | Korean                                      |
| 19 | 2020, Surl et al.            | 26                 | 1.2            | F  | Yes    | NA      | No                   | no maintained fixation                                          | +3.5/+3.5                  | non-recordable       | systemically normal                                                                                                            | c.196C>T             | p.Arg66Trp  | c.709C>T              | p.Arg237Cys      | Korean                                      |
| 19 | 2020, Surl et al.            | 29                 | 0.8            | F  | Yes    | NA      | No                   | no maintained fixation                                          | +6.5/+6.5                  | non-recordable       | systemically normal                                                                                                            | exon 4-5 deletion    |             | c.709C>T              | p.Arg237Cys      | Korean                                      |
| 19 | 2020, Surl et al.            | 30                 | 1.3            | F  | Yes    | NA      | No                   | no maintained fixation                                          | +5/+5                      | non-recordable       | systemically normal                                                                                                            | exon 2 deletion      |             | c.709C>T              | p.Arg237Cys      | Korean                                      |
| 12 | 2012, Falk et al.            | CHOP/MEEI-047-IV-1 | 11             | F  | Yes    | Yes     | Yes                  | not fix or follow objects                                       | NA                         | non-recordable       | enophthalmos, corneal opacity OS, sensorineural hearing loss, developmental delay, non-verbal autism (GJB2 mutations combined) | c.25G>A              | p.Val9Met   | c.25G>A               | p.Val9Met        | Pakistani                                   |
| 31 | 2017, Han et al.             | P4                 | 13m            | M  | Yes    | NA      | Yes                  | severe visual impairment                                        | +5.5/+5.5                  | non-recordable       |                                                                                                                                | c.196C>T             | p.Arg66Trp  | c.709C>T              | p.Arg237Cys      | Korean                                      |
| 31 | 2017, Han et al.             | P5                 | 7m             | F  | Yes    | NA      | Yes                  | severe visual impairment                                        | +4/+5                      | non-recordable       |                                                                                                                                | c.196C>T             | p.Arg66Trp  | c.709C>T              | p.Arg237Cys      | Korean                                      |
| 31 | 2017, Han et al.             | P6                 | 12m            | M  | Yes    | NA      | Yes (marbled fundus) | severe visual impairment                                        | +4/+3.5                    | non-recordable       |                                                                                                                                | c.709C>T             | p.Arg237Cys | ? (not detected)      |                  | Korean                                      |
| 30 | 2017, Jinda et al.           | LCATH3             | 13m            | M  | Yes    | Yes     | Yes                  | wondering eye                                                   | +4.5/-0.3                  | non-recordable       |                                                                                                                                | c.196C>T             | p.Arg66Trp  | c.634G>A              | p.Val212Met      | Thai                                        |
| 9  | 2012, Chiang et al.          | 6                  | 6m             | F  | Yes    | NA      | Yes                  | able to see colors and shapes until 22 & 24 y.o., LP at 26 y.o. | NA                         | NA                   |                                                                                                                                | c.451G>T             | p.Val151Phe | c.769G>A              | p.Glu257Lys      | Canada                                      |
| 12 | 2012, Falk et al.            | LVPEI-73-II-2      | 5m             | NA | Yes    | minimal | Yes                  | fixing on and following light                                   | NA                         | NA                   |                                                                                                                                | c.25G>A              | p.Val9Met   | c.25G>A               | p.Val9Met        | Indian                                      |
| 12 | 2012, Falk et al.            | LVPEI-100-II-2     | 3m             | NA | Yes    | minimal | Yes                  | following and fixing light                                      | +9                         | NA                   | 7-year follow-up                                                                                                               | c.709C>T             | p.Arg237Cys | c.565delG             | p.Ala189Leufs*25 | Indian                                      |
| 10 | 2012, Perrault et al.        | P9                 | 19             | M  | Yes    | NA      | NA                   | CF                                                              | +3/+0.75                   | NA                   | photophobia and night blindness                                                                                                | c.619C>T             | p.Arg207Trp | c.769G>A              | p.Glu257Lys      | France                                      |
| 10 | 2012, Perrault et al.        | P11.1              | 24             | M  | Yes    | Yes     | Yes                  | CF                                                              | +2/+3.5                    | NA                   |                                                                                                                                | c.619C>T             | p.Arg207Trp | c.769G>A              | p.Glu257Lys      | France                                      |
| 10 | 2012, Perrault et al.        | P11.2              | 20             | M  | Yes    | Yes     | Yes                  | CF                                                              | +2/+3.5                    | NA                   |                                                                                                                                | c.619C>T             | p.Arg207Trp | c.769G>A              | p.Glu257Lys      | France                                      |
| 10 | 2012, Perrault et al.        | P17                | 28             | F  | NA     | NA      | NA                   | CF                                                              | NA                         | NA                   | photophobia                                                                                                                    | c.716T>C             | p.Leu239Ser | c.769G>A              | p.Glu257Lys      | France                                      |
| 10 | 2012, Perrault et al.        | P21                | 16             | F  | Yes    | NA      | NA                   | CF                                                              | high hyperopia             | NA                   | night blindness                                                                                                                | c.507G>A             | p.Trp169*   | c.507G>A              | p.Trp169*        | Algeria                                     |
| 10 | 2012, Perrault et al.        | P24                | 22             | NA | Yes    | NA      | Yes                  | CF                                                              | +3/+3.75                   | NA                   | photophobia                                                                                                                    | c.507G>A             | p.Trp169*   | ?                     |                  | France                                      |
| 11 | 2012, Koenekoop et al.       | MOGL512            | 13             | M  | Yes    | Yes     | Yes                  | CF                                                              | hyperopia                  | NA                   | nystagmus                                                                                                                      | c.619C>T             | p.Arg207Trp | c.769G>A              | p.Glu257Lys      | French Candadian                            |
| 11 | 2012, Koenekoop et al.       | MOGL3294           | 41             | NA | Yes    | Yes     | Yes                  | CF                                                              | hyperopia                  | NA                   | nystagmus                                                                                                                      | c.199G>T             | p.Val67Phe  | c.769G>A              | p.Glu257Lys      | Russian                                     |
| 11 | 2012, Koenekoop et al.       | MOGL3698           | 10             | NA | Yes    | Yes     | Yes                  | CF                                                              | hyperopia                  | NA                   | nystagmus                                                                                                                      | c.37G>A              | p.Ala13Thr  | c.293T>A              | p.Val98Gly       | Haitian (African)                           |
| 16 | 2016, Wang et al.            | 18a                | 5              | F  | Yes    | Yes     | Yes                  | CF                                                              | +2.5                       | NA                   | night blindness                                                                                                                | c.695G>A             | p.Arg232Lys | c.695G>A              | p.Arg232Lys      | Han Chinese                                 |
| 34 | 2018, Khan, et al.           | II-3               | 10             | M  | Yes    | No      | No                   | 2/200                                                           | +4.25/+5.25                | NA                   | unlike II-1, no apparent difference in day/night vision                                                                        | c.500A>G             | p.Asn167Ser | c.500A>G              | p.Asn167Ser      | Arab                                        |
| 11 | 2012, Koenekoop et al.       | MOGL3174           | 33             | F  | Yes    | Yes     | Yes                  | 20/2000                                                         | hyperopia                  | NA                   | nystagmus                                                                                                                      | c.507G>A             | p.Trp169*   |                       |                  | Irish                                       |
| 34 | 2018, Khan, et al.           | II-1               | 13             | F  | Yes    | No      | No                   | 4/200                                                           | +6/+6                      | cone-rod dysfunction | CRD rather than LCA, but fundus findings were LCA9, CCDC66 mutations were also found but probably not pathogenic               | c.500A>G             | p.Asn167Ser | c.500A>G              | p.Asn167Ser      | Arab                                        |
| 25 | 2015, Coppieters et al.      | F3-II:1            | 3m             | M  | Yes    | No      | No                   | 0.03                                                            | +1.31                      | non-recordable       | night blindness                                                                                                                | c.709C>T             | p.Arg237Cys | partial gene deletion |                  | Japanese                                    |
| 12 | 2012, Falk et al.            | UCL-3-II-1         | 10             | F  | Yes    | NA      | Yes                  | 1.5 logMAR                                                      | +3/+5                      | non-recordable       |                                                                                                                                | c.37G>A              | p.Ala13Thr  | c.293T>G              | p.Val98Gly       | Caribbean                                   |
| 23 | 2014, Siemiatkowska et al.   | 3.1                | 7              | M  | Yes    | No      | Yes (subtle)         | 2/60                                                            | +3                         | non-recordable       | none                                                                                                                           | c.617A>G             | p.H206A     | c.769G>A              | p.Glu257Lys      | Dutch                                       |
| 16 | 2016, Wang et al.            | 19                 | 5              | F  | Yes    | Yes     | Yes                  | 0.05                                                            | +2                         | NA                   | night blindness, exdative change                                                                                               | c.43G>A              | p.Gly15Ser  | c.634G>A              | p.Val212Met      | Han Chinese                                 |
| 10 | 2012, Perrault et al.        | P8                 | 6              | F  | Yes    | NA      | NA                   | 1/20                                                            | +5.5/+4.5                  | NA                   |                                                                                                                                | c.619C>T             | p.Arg207Trp | c.769G>A              | p.Glu257Lys      | France                                      |
| 10 | 2012, Perrault et al.        | P12                | 45             | F  | NA     | NA      | NA                   | 1/20                                                            | NA                         | NA                   |                                                                                                                                | c.619C>T             | p.Arg207Trp | c.769G>A              | p.Glu257Lys      | France                                      |
| 10 | 2012, Perrault et al.        | P14                | 49             | M  | Yes    | Yes     | Yes                  | <1/20                                                           | +8/+8                      | NA                   | night blindness                                                                                                                | c.619C>T             | p.Arg207Trp | c.769G>A              | p.Glu257Lys      | France                                      |
| 35 | 2018, Nash et al.            | Case 2             | 7              | F  | Yes    | No      | No                   | 6/90 > 6/120                                                    | +1/+2                      | cone-rod dysfunction | fundi are similar to Case 1                                                                                                    | c.53A>G              | p.Asn18Ser  | c.769G>A              | p.Glu257Lys      | Caucasian                                   |

|    |                         |                |      |    |     |         |          |                       |             |                  |                                                                           |                   |              |                   |             |             |
|----|-------------------------|----------------|------|----|-----|---------|----------|-----------------------|-------------|------------------|---------------------------------------------------------------------------|-------------------|--------------|-------------------|-------------|-------------|
| 39 | 2020, Ruberto et al.    | 1              | 1y1m | F  | Yes | Yes     | Yes      | 0.7/10                | NA          | non-recordable   | peripheral coloboma, pendular nystagmus                                   | c.619C>T          | p.Arg207Tyr? | c.769G>A          | p.Glu257Lys | Italy       |
| 10 | 2012, Perrault et al.   | P10            | 9    | F  | Yes | NA      | NA       | <1/10                 | +8.25/+9.75 | NA               | moderate photophobia                                                      | c.619C>T          | p.Arg207Trp  | c.769G>A          | p.Glu257Lys | France      |
| 9  | 2012, Chiang et al.     | 4              | 6m   | M  | Yes | NA      | Yes      | 20/200 can see colors | NA          | cone dysfunction | cone-rod dysfunction, poor night vision                                   | c.457C>G          | p.Leu153Val  | c.769G>A          | p.Glu257Lys | Canada      |
| 12 | 2012, Falk et al.       | LVPEI-128-II-3 | 28   | M  | Yes | minimal | moderate | 20/280, 20/150        | NA          | NA               |                                                                           | c.817A>G          | p.Asn273Asp  | c.215T>A          | p.Leu72His  | Indian      |
| 35 | 2018, Nash et al.       | Case 1         | 26   | F  | Yes | No      | No       | 6/45, 1/120           | -1.7/-2     | cone dysfunction | large macular degeneration beyond the vascular arcade                     | c.271G>A          | p.Glu91Lys   | c.271G>A          | p.Glu91Lys  | Indian      |
| 39 | 2020, Ruberto et al.    | 16             | 1    | NA | Yes | Yes     | No       | 1.5/10                | NA          | NA               | CGH array deletion in Crl p36.22 involving NMNAT1 gene, Jerky nystagmus   | c.769G>A          | p.Glu257Lys  | c.769G>A          | p.Glu257Lys | Italy       |
| 24 | 2015, Wang et al.       | SRF94          | 19   | M  | Yes | NA      | Yes      | 0.03/0.2              | hyperopia   | NA               | nystagmus                                                                 | c.116-2A>G        |              | c.634G>A          | p.Val212Met | Cinese      |
| 41 | 2020, Habibi et al.     | F16-V.1        | 23   | F  | No  | No      | Yes      | 5/10, 5/10            | NA          | NA               | RP, OCT normal, relatively preserved visual acuity until the third decade | c.37G>A           | p.Ala13Thr   | c.37G>A           | p.Ala13Thr  | Tunisia     |
| 41 | 2020, Habibi et al.     | F16-V.4        | 21   | M  | No  | Yes     | Yes      | 7/10, 6/10            | NA          | NA               | RP, OCT normal, relatively preserved visual acuity until the third decade | c.37G>A           | p.Ala13Thr   | c.37G>A           | p.Ala13Thr  | Tunisia     |
| 9  | 2012, Chiang et al.     | 10             | 30   | M  | NA  | NA      | NA       | NA                    | NA          | NA               |                                                                           | c.255G>A          | p.Trp85*     | c.769G>A          | p.Glu257Lys | Canada      |
| 10 | 2012, Perrault et al.   | P13            | 31   | M  | NA  | NA      | NA       | NA                    | NA          | NA               |                                                                           | c.619C>T          | p.Arg207Trp  | c.769G>A          | p.Glu257Lys | France      |
| 10 | 2012, Perrault et al.   | P23.1          | NA   | NA | Yes | NA      | Yes      | NA                    | +6          | NA               |                                                                           | c.769G>A          | p.Glu257Lys  | ?                 | ?           | Portugal    |
| 11 | 2012, Koenekoop et al.  | MOGL1269       | NA   | F  | NA  | NA      | NA       | NA                    | NA          | NA               |                                                                           | c.451G>A          | p.Val151Phe  | c.769G>A          | p.Glu257Lys | European    |
| 25 | 2015, Coppieters et al. | F1-IV:1        | NA   | F  | Yes | NA      | NA       | NA                    | NA          | NA               |                                                                           | c.-70A>T          | p.?          | c.-70A>T          | p.?         | Niger       |
| 25 | 2015, Coppieters et al. | F1-IV:2        | NA   | F  | Yes | NA      | NA       | NA                    | NA          | NA               |                                                                           | c.-70A>T          | p.?          | c.-70A>T          | p.?         | Niger       |
| 25 | 2015, Coppieters et al. | F1-IV:4        | NA   | F  | Yes | NA      | NA       | NA                    | NA          | NA               |                                                                           | c.-70A>T          | p.?          | c.-70A>T          | p.?         | Niger       |
| 25 | 2015, Coppieters et al. | F2-IV:2        | NA   | M  | Yes | NA      | Yes      | NA                    | NA          | NA               |                                                                           | c.-69C>T          | p.?          | c.-70A>T          | p.?         | Morocco     |
| 25 | 2015, Coppieters et al. | F2-IV:3        | NA   | F  | Yes | NA      | Yes      | NA                    | NA          | NA               |                                                                           | c.-69C>T          | p.?          | c.-70A>T          | p.?         | Morocco     |
| 25 | 2015, Coppieters et al. | F5             | NA   | NA | NA  | NA      | NA       | NA                    | NA          | NA               |                                                                           | c.364del          | p.Arg122fs   | c.769G>A          | p.Glu257Lys | NA          |
| 25 | 2015, Coppieters et al. | F6             | NA   | NA | NA  | NA      | NA       | NA                    | NA          | NA               |                                                                           | c.542A>G          | p.Tyr181Cys  | c.769G>A          | p.Glu257Lys | NA          |
| 25 | 2015, Coppieters et al. | F7             | NA   | NA | NA  | NA      | NA       | NA                    | NA          | NA               |                                                                           | c.679C>T          | p.Arg227Trp  | c.769G>A          | p.Glu257Lys | NA          |
| 25 | 2015, Coppieters et al. | F8             | NA   | NA | NA  | NA      | NA       | NA                    | NA          | NA               |                                                                           | c.562C>T          | p.Arg188Trp  | ?                 | ?           | NA          |
| 25 | 2015, Coppieters et al. | F9             | NA   | NA | NA  | NA      | NA       | NA                    | NA          | NA               |                                                                           | c.53A>G           | p.Asn18Ser   | ?                 | ?           | NA          |
| 29 | 2016, Xu et al.         | LH01-II:1      | NA   | NA | NA  | NA      | NA       | NA                    | NA          | NA               | (no clinical data was presented)                                          | c.196C>T          | p.Arg66Trp   | c.G634A           | p.V212M     | Chinese     |
| 29 | 2016, Xu et al.         | LH01-II:2      | NA   | NA | NA  | NA      | NA       | NA                    | NA          | NA               | (no clinical data was presented)                                          | c.196C>T          | p.Arg66Trp   | c.G634A           | p.V212M     | Chinese     |
| 29 | 2016, Xu et al.         | QT1118-II:1    | NA   | NA | NA  | NA      | NA       | NA                    | NA          | NA               | (no clinical data was presented)                                          | c.619C>T          | p.Arg207Trp  | c.721C>T          | p.Pro241Ser | Chinese     |
| 29 | 2016, Xu et al.         | QT1118-II:3    | NA   | NA | NA  | NA      | NA       | NA                    | NA          | NA               | (no clinical data was presented)                                          | c.619C>T          | p.Arg207Trp  | c.721C>T          | p.Pro241Ser | Chinese     |
| 29 | 2016, Xu et al.         | LH05-II:1      | NA   | NA | NA  | NA      | NA       | NA                    | NA          | NA               | (no clinical data was presented)                                          | c.737A>T          |              | c.737A>T          |             | Chinese     |
| 32 | 2017, Di Iorio et al.   | 27             | 5    | NA | NA  | NA      | Yes      | NA                    | NA          | NA               | onset: 9m                                                                 | c.53A>G           | p.Asn18Ser   | c.542A>G          | p.Tyr181Cys | Italy       |
| 33 | 2017, Porto et al.      | 20-FBP_57      | NA   | NA | NA  | NA      | NA       | NA                    | NA          | NA               | (no clinical data was presented)                                          | c.37G>A           | p.Ala13Thr   | c.293T>G          | p.Val98Gly  | Brazilian   |
| 18 | 2018, Hosono et al.     | EYE159         | NA   | NA | NA  | NA      | NA       | NA                    | NA          | NA               |                                                                           | c.196C>T          | p.Arg66Trp   | c.709C>T          | p.Arg237Cys | Japanese    |
| 36 | 2018, Han et al.        | -              | 60   | M  | Yes | Yes     | Yes      | NA                    | NA          | NA               |                                                                           | NA                |              | NA                | NA          | NA          |
| 38 | 2020, Xu et al.         | -              | NA   | NA | NA  | NA      | NA       | NA                    | NA          | NA               |                                                                           | c.196C>T          | p.Arg66Trp   | c.721C>T          | p.Pro241Ser | Chinese     |
| 40 | 2020, Bedoni et al.     | Family 2-P3    | 1    | M  | NA  | NA      | NA       | NA                    | NA          | NA               |                                                                           | 7.1kb duplication |              | 7.1kb duplication |             | Italy       |
| 42 | 2020, Hull et al.       | -              | NA   | NA | NA  | NA      | NA       | NA                    | NA          | NA               |                                                                           | c.553T>C          | p.Cys185Arg  | c.769G>A          | p.Glu257Lys | New Zealand |
| 45 | 2021, Han et al.        | -              | 6m   | F  | Yes | Yes     | Yes      | NA                    | NA          | NA               | Coats' disease                                                            | c.196C>T          | p.Arg66Trp   | c.709C>T          | p.Arg237Cys | Korean      |

NA: not available, y: years, m: months, w: weeks, NLP: no light perception, LP: light perception, CF: counting fingers, CRD: cone-rod dystrophy, LCA: Leber congenital amaurosis, RP: retinitis pigmentosa, OCT: Optical coherence tomographty, y.o.: years old, MD: macular degeneration, IOL: intraocular lens, VEP: visual evoked potential, SHILCA: spondylo-epiphyseal dysplasia, sensorineural hearing loss, intellectual disability and Leber congenital amaurosis

The variants are transcribed exactly as presented in the original article.
